## 1 **Water for sterol: an unusual mechanism of sterol egress from a StARkin domain**

2

3 George Khelashvili<sup>1,2,\*</sup>, Kalpana Pandey<sup>3,†</sup>, Neha Chauhan<sup>3</sup>, David Eliezer<sup>3\*</sup>, and Anant K.  
4 Menon<sup>3\*</sup>

5

6 <sup>1</sup>Department of Physiology and Biophysics, Weill Cornell Medical College, 1300 York Ave, New  
7 York, NY 10065, USA; <sup>2</sup>Institute for Computational Biomedicine, Weill Cornell Medical College,  
8 1300 York Ave, New York, NY 10065, USA; <sup>3</sup>Department of Biochemistry, Weill Cornell Medical  
9 College, 1300 York Ave, New York, NY 10065, USA

10

11 <sup>†</sup>These authors contributed equally to this work

12

### 13 **\*For correspondence:**

14 Anant K. Menon - [akm2003@med.cornell.edu](mailto:akm2003@med.cornell.edu)

15 George Khelashvili - [gek2009@med.cornell.edu](mailto:gek2009@med.cornell.edu)

16 David Eliezer - [dae2005@med.cornell.edu](mailto:dae2005@med.cornell.edu)

17

18 Competing interests: The authors declare that no competing interests exist

19

### 20 **Abstract**

21 Previously we identified a new family of endoplasmic reticulum membrane proteins that  
22 possess sterol-binding StARkin domains (Gatta et al. eLife 2015). These Lam/GramD1 proteins  
23 are implicated in intracellular sterol homeostasis, a function that requires them to be able to  
24 bind sterols. Here we show how these proteins exchange sterol molecules with membranes. An  
25 aperture at one end of the StARkin domain enables sterol to enter/exit the binding pocket.  
26 Strikingly, the wall of the pocket is fractured along its length, exposing bound sterol to solvent.  
27 We considered whether hydration of the pocket could mediate sterol entry/exit. Large-scale  
28 atomistic molecular dynamics simulations reveal that sterol egress involves widening of the  
29 fracture, penetration of water into the cavity and consequent destabilization of the bound  
30 sterol. The simulations also identify polar residues along the fracture that are important for  
31 sterol release. Their replacement with alanine affects the ability of the StARkin domain to bind  
32 sterol, catalyze inter-vesicular sterol exchange and alleviate the nystatin-sensitivity of *lam2Δ*  
33 yeast cells. These data suggest an unprecedented, water-controlled mechanism of sterol  
34 acquisition and discharge from a StARkin domain.

## 1 Introduction

2 Cholesterol, the 'central lipid of mammalian cells' (1), is the most abundant molecular  
3 component of the mammalian plasma membrane (PM) where it represents one out of every 2-  
4 3 lipids (1,2). Like many membrane lipids, it is synthesized in the endoplasmic reticulum (ER)  
5 and transported to the PM by non-vesicular mechanisms that make use of lipid transport  
6 proteins (3,4). These proteins operate as molecular ferries, achieving lipid exchange between  
7 membranes by reversibly extracting a lipid from the cytoplasmic leaflet of one membrane  
8 bilayer, encapsulating it within a binding pocket for transfer through the cytoplasm, and  
9 depositing it in the cytoplasmic leaflet of another membrane. Proteins with steroidogenic acute  
10 regulatory protein related lipid transfer (StART) domains constitute a major family of  
11 intracellular lipid transport proteins - the StARkin superfamily - implicated in moving  
12 glycerophospholipids, ceramide and sterol between cellular membranes (5,6). Whereas these  
13 proteins are generally soluble and able to diffuse freely through the cytoplasm, a new family of  
14 ER membrane proteins with StARkin domains was recently identified, including six members  
15 (Lam1-Lam6) in the budding yeast *Saccharomyces cerevisiae* and three members (GramD1a-  
16 GramD1c) in mammals (7-10). Members of this new sub-family have one or two StARkin  
17 domains that bind sterols and catalyze sterol exchange between populations of vesicles *in vitro*  
18 (7,9,11-14). Lam1-Lam4 localize to ER-PM contact sites in yeast (7,15) where they play a role in  
19 sterol homeostasis. Thus, yeast cells lacking one or more of these proteins are hypersensitive to  
20 the sterol-binding, polyene antibiotics amphotericin and nystatin, implying alterations in PM  
21 sterol content and/or organization (7,16). Furthermore, they esterify exogenously supplied  
22 sterols up to 3-fold more slowly than wild-type cells, indicative of a delay in some aspect of PM-  
23 ER sterol transport (7,16). A sterol homeostatic role has also been suggested for mouse  
24 GramD1b protein which is highly expressed in steroidogenic organs. Thus, adrenal glands from  
25 a GramD1b knockout mouse are devoid of lipid droplets and show a severe reduction in  
26 cholesteryl ester content (14).

27 We recently reported crystal structures of the second StARkin domain of Lam4 (here  
28 termed Lam4S2) in *apo*- and sterol-bound states (11). The protein has an overall  $\alpha/\beta$  helix-grip  
29 fold that forms a capacious binding pocket into which the sterol appears to be admitted head-  
30 first, via an aperture at one end, such that its 3- $\beta$ -hydroxyl head-group is stabilized by direct or  
31 water-mediated interactions with polar residues (**Figure 1A**). The surface of the protein near  
32 the entrance to the pocket is decorated with lysine residues, accounting for the enhanced  
33 ability of Lam4S2 to transfer sterol between anionic vesicles compared with neutral vesicles  
34 (11); the entryway itself is partially occluded by a flexible loop, termed  $\Omega_1$  (**Figure 1A**), whose  
35 functional importance in the StARkin family is well-documented through mutagenesis studies  
36 (12,17,18). The structures of other Lam/GramD1 StARkin domains are similar (12-14), broadly  
37 resembling structures of other members of the StARkin superfamily except for one striking  
38 feature. The wall of the sterol binding cavity in all Lam/GramD1 StARkin domains is fractured  
39 along part of its length, exposing the sterol backbone to bulk solvent (**Figure 1-figure**  
40 **supplement 1**). We considered whether this unusual structural feature - henceforth termed  
41 'side-opening' - might provide a mechanism to control the stability of sterol within the binding  
42 pocket. We posited that the ability to load sterol into the pocket, or discharge it from the  
43 pocket into the membrane, might be controlled by water permeation via the side-opening. We  
44 used a combination of large-scale atomistic molecular dynamics (MD) simulations and

1 functional tests to explore this hypothesis. Analysis of extensive ensemble and umbrella  
2 sampling MD trajectories revealed that sterol egress from Lam4S2 is associated with widening  
3 of the side-entrance to the binding pocket, penetration of water molecules into the cavity and  
4 consequent destabilization of the bound sterol. The simulations identified several polar  
5 residues that line the side-entrance to the pocket and that appear to play a critical role in the  
6 initial steps of the release process. The functional importance of these residues was validated  
7 experimentally by showing that their replacement with alanine compromises the ability of  
8 Lam4S2 to rescue the nystatin-sensitivity of *lam2Δ* yeast cells and reduces the efficiency with  
9 which the purified protein is able to extract membrane-bound sterol and catalyze sterol  
10 exchange between populations of vesicles *in vitro*. These data suggest an unprecedented,  
11 water-controlled mechanism of sterol acquisition and discharge from a StARkin domain.  
12

## 13 Results

### 14 Lam4S2 associates with the membrane via its $\Omega$ 1 loop and C-terminal helix

15 We used atomistic MD simulations of Lam4S2 to explore the impact of the unique lateral  
16 opening in Lam/GramD1 StARkin domains on the stability of bound sterol and its ability to exit  
17 the binding pocket. Cholesterol-bound Lam4S2 (**Figure 1A**) was placed in the vicinity of a  
18 membrane bilayer (**Figure 1B**) having the composition of anionic “Acceptor” liposomes used for  
19 *in vitro* sterol transport assays (11), and its spontaneous binding to the membrane surface was  
20 monitored via ensemble MD simulations carried out in 10 statistically independent replicates  
21 (Stage 1 ensemble simulations, 3.2  $\mu$ s cumulative time). The simulations showed two modes by  
22 which Lam4S2 associated with the membrane. In one mode, the protein interacted with lipid  
23 headgroups via its N- and C-termini (green and red; **Figure 1C, D**). As these regions are linked to  
24 adjacent parts of the protein chain in full-length Lam4, i.e. the S1 domain and the  
25 transmembrane helix, respectively, this mode of association is likely a non-physiological artifact  
26 of simulating the isolated Lam4S2 domain and was not pursued further. In the second mode,  
27 Lam4S2 engaged with the membrane via its  $\Omega$ 1 loop (purple; **Figure 1C, E**) and its C-terminal  
28 helix (yellow; **Figure 1C, E**). The former is a functionally important feature of all StARkin  
29 domains (12,17,18), whereas the latter harbors cationic residues (e.g., K163, K167) which have  
30 been implicated in the *in vitro* sterol transfer activity of Lam4S2 (11,17) and the protein StARD4  
31 (18). In this binding mode, cholesterol is oriented orthogonally to the plane of membrane, with  
32 its 3- $\beta$ -OH group engaging Q121 in the binding pocket of Lam4S2 and its iso-octyl tail facing the  
33 membrane (**Figure 1E**). We hypothesized that in this position the protein is primed to release  
34 sterol into the membrane and proceeded to test this premise by enhancing the sampling of this  
35 mode of Lam4S2-membrane interaction. To this end, we initiated a new set of 100 independent  
36 MD simulations (with random starting velocities) from 10 conformations of the system in which  
37 the  $\Omega$ 1 loop and the C-terminal helix were simultaneously engaged with lipids (Stage 2  
38 ensemble simulations, 37.5  $\mu$ s cumulative time). As described next, these trajectories revealed  
39 detailed mechanistic steps leading to spontaneous release of the protein-bound cholesterol  
40 into the membrane.  
41

### 42 Mechanistic steps of cholesterol transfer from Lam4S2 to the membrane

1 To facilitate analyses of the conformational dynamics of the membrane-bound Lam4S2-  
2 cholesterol complex in Stage 2 simulations, we used the time-structure based independent  
3 component analysis (tICA) approach to reduce the dimensionality of the system (see Methods).  
4 To this end, we considered a set of collective variables (CVs) to describe the dynamics of  
5 cholesterol and relevant segments of the protein (i.e. the  $\Omega_1$  loop and the C-terminal helix) as  
6 well as to quantify solvent exposure of the sterol binding site (see Methods for details). All the  
7 trajectory frames from Stage 2 simulations were projected on the first two tICA vectors, which  
8 represented  $\sim 90\%$  of the total dynamics of the system (*Figure 2-figure supplement 2A*). The  
9 resulting 2D space (*Figure 2A*), was discretized for structural analyses into 100 microstates  
10 using the automated *k*-means clustering algorithm (*Figure 2-figure supplement 2B*). These  
11 microstates cover the conformational space of the system as the cholesterol molecule is  
12 transferred from the protein-bound state to the membrane.

13 Structural analyses of selected microstates on the tICA landscape (labeled 1-7 in *Figure 2A*),  
14 characterized by relevant CVs (*Figure 2B*) and visualized in structural snapshots (*Figure 2C*)  
15 describe key mechanistic steps of the sterol release process. Microstate 1 represents an  
16 ensemble of states in which the sterol binding cavity is occluded from both the solvent and the  
17 membrane. Thus, in Microstate 1 conformations (*Figure 2B, C*), cholesterol is stably bound in  
18 the protein (“chol RMSD” histogram (bottom panel, *Figure 2B*)), while the sterol binding pocket  
19 is dehydrated (“water count” histogram (bottom panel, *Figure 2B*)) and sealed from the side by  
20 the side-chains of residues S181 and D61 that line the side-entrance to the pocket ( $d_{61-181}$   
21 distance histogram (bottom panel, *Figure 2B*)). In addition, the  $\Omega_1$  loop is positioned close to  
22 the C-terminal helix so that the  $C_\alpha$  atoms of residues I95 in the  $\Omega_1$  loop and A169 in the C-  
23 terminal helix are within  $\sim 10\text{\AA}$  of each other ( $d_{95-169}$  distance histogram (bottom panel, *Figure*  
24 *2B*); see the middle structure in *Figure 2C* for the location of A169), therefore occluding the  
25 sterol binding pocket from below, i.e. the vantage point of the membrane. Indeed, as shown in  
26 *Figure 2-figure supplement 3*, in the ensemble of conformations representing Microstate 1,  
27 cholesterol has essentially no contact with membrane lipids (“number of lipids” histogram  
28 (bottom panel, *Figure 2-figure supplement 3B*)).

29 The first step in the sterol release process involves widening of the side-entrance to the  
30 sterol binding site enabled by gradual separation of the side-chains of residues D61 and S181.  
31 This structural change on the tICA landscape can be followed in the evolution of the system  
32 from Microstate 1 to Microstates 2 and 3 (see  $d_{61-181}$  distance histogram (*Figure 2B*)).  
33 Concomitant with the widening of the side-entrance, the level of hydration (water count) of the  
34 binding pocket progressively increases (*Figure 2B, C*).

35 Cholesterol remains stably bound throughout these initial events (cholesterol RMSD is  
36 unchanged in Microstates 1-3). However, the rising level of hydration in the binding site results  
37 in destabilization of the polar interactions between the 3- $\beta$ -OH group of cholesterol and the  
38 side-chain of residue Q121 as cholesterol initiates its translocation towards the membrane.  
39 Indeed, as the system transitions from Microstate 3 to Microstate 4, the RMSD of the  
40 cholesterol molecule increases (*Figure 2B*). Correspondingly, the minimum distance between  
41 the cholesterol oxygen and residue Q121 increases by  $\sim 4\text{\AA}$  (compare  $d_{\text{chol-121}}$  for Microstates 1  
42 and 4, *Figure 2-figure supplement 3*). Notably, as the cholesterol molecule assumes this new  
43 position, the distance between the  $\Omega_1$  loop and the C-terminal helix increases as seen in the

1 broadening of the  $d_{95-169}$  histogram (**Figure 2B**), indicating initial opening of the sterol binding  
2 pocket towards the membrane.

3 Cholesterol egress then proceeds through Microstates 5-7 in which the sterol binding  
4 pocket remains open and solvated, while the  $\Omega_1$  loop continues to sample conformations that  
5 position it relatively far from the C-terminal helix (**Figure 2B, C**). The cholesterol molecule  
6 leaves the binding pocket with its tail “down”, becoming gradually encapsulated by the  
7 hydrophobic chains of neighboring lipids until it fully embeds into the lipid membrane  
8 (“number of lipids” histogram (bottom panel, **Figure 2-figure supplement 3B**) and  
9 corresponding structural snapshots (**Figure 2-figure supplement 3D**)). The process of  
10 translocation is complete when the system reaches Microstate 7. The remaining part of the tICA  
11 space (corresponding to lower tIC1 and tIC2 values, i.e. bottom left region of the 2D space in  
12 **Figure 2A**), describes trajectory data in which Lam4S2 disengages from the membrane, after  
13 the release of the sterol, and diffuses into the solvent. Of note, the high level of hydration of  
14 the binding site in empty Lam4S2, i.e. after the sterol egress, is recapitulated in MD simulations  
15 of the *apo* Lam4S2 system (initiated from the sterol-free Lam4S2 structure, PDBID 6BYD) run  
16 under the same conditions as the Stage 1 simulations of the cholesterol-bound Lam4S2  
17 described in **Figure 1** (see **Figure 2-figure supplement 4** and Methods for more details).

18 The sterol translocation process outlined above was sampled in its entirety in 5 out of 100  
19 Stage 2 simulations (trajectories highlighted in red in **Figure 2-figure supplement 5**). Another 19  
20 trajectories in this set sampled evolution of the system from Microstate 1 to Microstate 5  
21 (trajectories marked with a green star in **Figure 2-figure supplement 5**), but on the time scales  
22 of these simulations, the system either did not progress further (i.e. to Microstates 6 and 7) or  
23 returned to Microstate 4 or 3 where it remained (see also below). In the remaining Stage 2  
24 simulations the system fluctuated between Microstates 1, 2, and 3 (unmarked trajectories in  
25 **Figure 2-figure supplement 5**).

## 26 27 **The side-opening to the sterol binding pocket is a key structural element of the** 28 **release mechanism**

29 The MD simulations indicate that widening of the side-opening to facilitate water penetration  
30 into the binding site (**Figure 3**) is a key step in the mechanism by which bound cholesterol  
31 leaves the protein to enter the membrane. To investigate in more detail the interplay between  
32 increased hydration of the sterol binding pocket, widening of the side-entrance to the binding  
33 cavity, and stability of cholesterol within the pocket, we analyzed the dynamics of D61 and S181  
34 and their interactions with other residues in the binding site during the simulations. We found  
35 that D61 is engaged in electrostatic interactions with residue K89 located in the  $\beta_2$  strand  
36 preceding the  $\Omega_1$  loop. Thus, the side-chain of K89 faces the entrance to the binding pocket  
37 where it interacts with the anionic side-chain of D61 (**Figure 2-figure supplement 3C, Figure 3**).  
38 This interaction is maintained in the initial stages of the translocation process (Microstates 1-4),  
39 but becomes unstable as the hydration of the sterol binding pocket reaches its highest levels  
40 after cholesterol leaves the site (note sampling of a wide range of  $d_{61-89}$  distances for  
41 Microstates 5-7 (**Figure 2-figure supplement 3C**)). These data suggest that D61, S181 and K89  
42 together participate in stabilizing the closed conformation of the side-entrance to the binding  
43 pocket.

1 Based on these results and considering the position of the K89 side-chain near the protein-  
2 solvent interface, we hypothesized that replacing the polar and relatively long side-chain of K89  
3 with a smaller hydrophobic moiety would promote widening of the side entrance, leading to  
4 destabilization of cholesterol in the binding pocket. Likewise, substituting D61 and S181 with  
5 residues with smaller size hydrophobic side-chains should have a similar destabilizing effect on  
6 bound cholesterol.

### 7 8 **Substitution of residues D61, S181, and K89 by Ala promotes hydration of the** 9 **binding site and destabilizes bound cholesterol**

10 To test these hypotheses, we computationally generated K89A, D61A, and S181A point-mutants  
11 of Lam4S2, and probed their dynamics using atomistic MD simulations. Specifically, we  
12 considered two snapshots taken at different time points (120 ns and 150 ns, respectively) from  
13 one of the (350 ns-long) Stage 2 trajectories of the wild type protein system in which sterol  
14 release was observed. For the wild-type protein at these time points the side-entrance to the  
15 pocket is closed (*Figure 2-figure supplement 6A*), the cholesterol molecule is stably bound  
16 (*Figure 2-figure supplement 6B*), and the level of hydration is relatively low (between 5-10  
17 water molecules (*Figure 2-figure supplement 6B*)). We introduced the three mutations  
18 separately into these two snapshots, and - for each construct - carried out 150 ns long unbiased  
19 MD simulations in 10 replicates (1.5  $\mu$ s total simulation time). Analysis of these trajectories  
20 revealed that for all the three mutants the hydration level of the sterol binding site increased  
21 rapidly, during the initial 4-5 ns of the simulations (*Figure 2-figure supplement 7A, C*; note that  
22 in the original wild type trajectory in which the mutations were introduced, reaching the same  
23 high level of hydration (>20 water molecules) required a considerably longer time ( $\sim$ 180 ns), see  
24 *Figure 2-figure supplement 6B*). Furthermore, cholesterol in the trajectories for the mutant  
25 proteins was destabilized in its binding pocket (*Figure 2-figure supplement 7B, D*). Indeed, on  
26 the simulation timescales, rapid destabilization was especially notable for the K89A system in  
27 which, for all but one replicate, the sterol was unstable in its binding site (panel labeled K89A,  
28 *Figure 2-figure supplement 7D*).

### 29 30 **K89A-Lam4S2 has a lower energy barrier for cholesterol release**

31 To address the effect of the K89A mutation on cholesterol stability quantitatively, we compared  
32 the energetics of sterol release in K89A versus the wild type system using umbrella sampling  
33 MD simulations. We constructed the potential of mean force (PMF) for cholesterol release by  
34 constraining the z-distance between the sterol hydroxyl oxygen and the C $\alpha$  atom of residue  
35 Q121,  $d_{Z(\text{chol-121})}$ , to different values in the range  $\in [2\text{\AA}; 20\text{\AA}]$  along the release pathway ( $d_{Z(\text{chol-121})}$   
36 histogram (*Figure 2-figure supplement 3B*). The results are shown in *Figure 4A*. For the wild  
37 type system, the PMF calculations indicate that cholesterol release requires overcoming an  
38 energy barrier of  $\sim$ 6 kcal/mole, and proceeds through two major steps that were also identified  
39 in our tICA analysis of Stage 2 simulations. Thus, the PMF has a global minimum at  $d_{Z(\text{chol-121})} \sim 2\text{\AA}$   
40 corresponding to the position of cholesterol in the binding site where its polar head-group is  
41 coordinated by residue Q121 (snapshot at the top right of *Figure 4A*), and two local minima  
42 (LM-1 and LM-2) at  $d_{Z(\text{chol-121})} \sim 10\text{-}14\text{\AA}$  and  $> 18\text{\AA}$ , respectively. The global minimum represents  
43 the ensemble of states found in Microstate 1-3 ( $d_{Z(\text{chol-121})}$  histogram, *Figure 2-figure*

1 *supplement 3B*), whereas LM-1 corresponds to the ensemble of states found in Microstate 5  
2 ( $d_{Z(\text{chol-121})}$  histogram, *Figure 2-figure supplement 3B*).

3 The PMF calculations reveal that the energy barrier that separates LM-1 from the global  
4 minimum is  $\sim 5$  kcal/mole (red trace in *Figure 4A*). This high energy cost is associated with the  
5 clear change in hydration of the sterol binding site and concomitant opening of the side-  
6 opening to the pocket (see WT profiles in *Figure 4B*). Indeed, the water count increases and the  
7 D61-S181 interaction is destabilized when the system transitions from  $d_{Z(\text{chol-121})} \in [2\text{\AA}; 6\text{\AA}]$  to  
8  $d_{Z(\text{chol-121})} \geq 7\text{\AA}$  (*Figure 4B, Figure 4-figure supplement 8A, C*). LM-2 represents the ensemble of  
9 states in which cholesterol is on the verge of exiting the protein, i.e. when it is mostly solvated  
10 by lipids and with its head-group on the level of the  $\Omega_1$  loop (see Microstate 6 in *Figure 2-figure*  
11 *supplement 3*). LM-1 and LM-2 are separated by an energy barrier of  $\sim 2$  kcal/mole. Overall, the  
12 presence of multiple minima on the PMF plot is consonant with our findings from the tICA  
13 analysis of the unbiased MD simulations described above that in some of the Stage 2  
14 trajectories the system evolved from Microstate 1 to Microstate 5, i.e. transitioned from the  
15 global minimum to LM-1 on the PMF plot, but either did not progress further to complete sterol  
16 egress, i.e. LM-2, or returned to the conformational space of the tICA landscape characterized  
17 by relatively low hydration of the sterol binding pocket, i.e. the global energy minimum.

18 Remarkably, comparison of the PMF plots for the wild type and the K89A systems (*Figure*  
19 *4A*) reveals that the mutation significantly lowers the barriers required for transitioning  
20 between the different energy minima. Thus, while the PMF profile for the K89A construct still  
21 has three energy minima, the energy cost to transition between the global minimum and LM-1  
22 in this system is  $\sim 2$  kcal/mole, and between LM-2 and LM-3 is  $\sim 1$  kcal/mole, resulting in an  
23 energy barrier of only  $\sim 3$  kcal/mole for the entire release process ( $d_{Z(\text{chol-121})} \in [2\text{\AA}; 20\text{\AA}]$ ), i.e.  
24 approximately half of that determined for the wild type system. This reduction in the energy  
25 cost can be explained by a greater extent of hydration of the binding site in K89A compared to  
26 the wild type construct. Indeed, in wild type Lam4S2 the binding site remains largely  
27 dehydrated until cholesterol disengages from Q121 ( $d_{Z(\text{chol-121})} \in [2\text{\AA}; 6\text{\AA}]$ ) (*Figure 4B, Figure 4-*  
28 *figure supplement 8A*), whereas in the K89A protein the level of solvation of the binding pocket  
29 is relatively high ( $> 10$  water molecules) even when cholesterol is interacting with Q121 (*Figure*  
30 *4B, Figure 4-figure supplement 8A*). These trends in binding site hydration are mirrored by  
31 changes in the  $d_{61-181}$  distance along the  $d_{Z(\text{chol-121})}$  coordinate (note destabilization of D61-S181  
32 interactions in the K89A system for small  $d_{Z(\text{chol-121})}$  values in *Figure 4-figure supplement 8C, D*).

33 Interestingly, the global minimum on the PMF profile of the K89A mutant is shifted  
34 compared to its location on the PMF plot of the wild type system from  $d_{Z(\text{chol-121})} \sim 2\text{\AA}$  to  $\sim 5\text{\AA}$   
35 (*Figure 4A*). We found that at the shortest  $d_{Z(\text{chol-121})}$  distances, cholesterol-Q121 interactions in  
36 the mutant are mostly mediated by water molecules, whereas at  $d_{Z(\text{chol-121})} \sim 5\text{\AA}$  the hydroxyl  
37 group of cholesterol is in direct contact with Q121 (see sharp peak at  $\sim 2\text{\AA}$  for  $d_{Z(\text{chol-121})} = 5\text{\AA}$  plot  
38 in *Figure 4-figure supplement 8B*, note that  $d_{Z(\text{chol-121})}$  is the Z-distance between the hydroxyl  
39 and the  $C_\alpha$  of Q121). This may also explain why the water content in the cavity is skewed  
40 towards lower values for  $d_{Z(\text{chol-121})} \sim 5\text{\AA}$  (*Figure 4B*). Thus, for both the wild type and K89A  
41 systems, the global minimum on the PMF plot corresponds to the ensemble of states in which  
42 cholesterol is engaged in direct interactions with Q121. Overall the PMF calculations reveal that  
43 the K89A substitution lowers the energy barrier for cholesterol release from Lam4S2 into the  
44 membrane and suggests that cholesterol is consequently less stable in the binding pocket.

1  
2 **Alanine substitution of residues at the side-entrance to the sterol binding**  
3 **pocket impacts the function of Lam4S2 in cells and *in vitro***

4 Our computational studies indicate that substitution of D61, K89 or S181 with alanine affects  
5 the degree of hydration of the sterol binding pocket and the stability of bound sterol, with the  
6 most significant effects seen for the K89A mutant. We tested the functionality of K89A and the  
7 other mutants using three types of experiments.

8 We previously showed that yeast cells lacking Ysp2/Lam2 (*lam2Δ* cells) are sensitive to the  
9 polyene antibiotic amphotericin B, and that this phenotype can be corrected by expressing a  
10 soluble GFP-Lam4S2 fusion protein (7). We verified that this was also the case for nystatin,  
11 another polyene antibiotic (**Figure 5A**, compare the first two rows in which *lam2Δ* cells are  
12 transformed with either an empty vector (row 1) or a vector for expression of GFP-Lam4S2 (row  
13 2), and plated on media without or with different amounts of nystatin). We then tested the  
14 ability of GFP-fused Lam4S2 proteins carrying either K89A, D61A, or S181A single-point  
15 mutations (GFP-Lam4S2(K89A), GFP-Lam4S2(D61A), GFP-Lam4S2(S181A), respectively) to  
16 rescue the nystatin sensitivity of the *lam2Δ* cells. **Figure 5A** shows that *lam2Δ* cells expressing  
17 GFP-Lam4S2(K89A) remained nystatin-sensitive, whereas those expressing GFP-Lam4S2(D61A)  
18 or GFP-Lam4S2(S181A) became resistant to the antibiotic, similar to *lam2Δ* cells expressing  
19 wild-type protein. As all the Lam4S2 variants tested were expressed at equivalent levels  
20 (revealed by SDS-PAGE immunoblotting (**Figure 5B**)), this cell-based assay indicates that the  
21 K89A mutant has a functional deficit, whereas the D61A and S181A proteins are able to provide  
22 cells with sufficient functionality to rescue their nystatin-sensitivity phenotype.

23 To test explicitly the ability of the mutants to extract sterol from membranes and catalyze  
24 sterol exchange between populations of vesicles, we expressed His-tagged versions of the  
25 proteins in *E. coli* and purified them by affinity chromatography and size exclusion. The D61A  
26 mutant proved problematic on account of its low yield and apparent instability, and so we  
27 focused on S181A and K89A (**Figure 6A**). Similar to wild-type Lam4S2, these mutants displayed  
28 monodisperse profiles on size exclusion (**Figure 6B**) and yielded circular dichroism spectra  
29 indicative of well-folded structures (**Figure 6C**).

30 Sterol extraction assays were performed by incubating the purified proteins with large,  
31 unilamellar vesicles containing [<sup>3</sup>H]cholesterol, and determining the amount of radioactivity  
32 and protein in the supernatant after ultracentrifugation to pellet the vesicles. Relative to the  
33 wild-type protein, the S181A mutant extracted only ~50% of sterol under our standard  
34 incubation conditions whereas the K89A mutant had essentially no ability to extract sterol  
35 (**Figure 6D**).

36 To probe sterol transfer activity of the Lam4S2 mutants, we performed *in vitro* sterol  
37 transport assays as previously described and depicted schematically in **Figure 7A**. Donor  
38 vesicles containing fluorescent dehydroergosterol (DHE) were incubated with acceptor vesicles  
39 containing the FRET acceptor dansyl-PE. Excitation of DHE results in sensitized fluorescence  
40 emission from dansyl-PE only when the two lipids are in the same vesicle. **Figure 7B** (see also  
41 **Figure 7D**) shows that under our standard conditions the wild-type protein increases the rate of  
42 DHE exchange ~7-fold over the spontaneous rate. The S181A mutant was similar to the wild-  
43 type protein, whereas the K89A mutant had essentially no activity (**Figure 7C, D**).



1 Overall, the three functional tests described above indicate that the K89A mutant is  
2 compromised in sterol handling - it is unable to extract sterol from membranes and transfer it  
3 between vesicles, accounting for its inability to rescue the nystatin sensitivity of *lam2Δ* cells.  
4 These functional outcomes are in line with our computational prediction that cholesterol would  
5 be unstable in the binding site of the Lam4S2 K89A. Interestingly, the partial inability of the  
6 S181A mutant to extract cholesterol did not affect its ability to catalyze sterol exchange or  
7 rescue the nystatin sensitivity of *lam2Δ* cells.  
8

## 9 Discussion

10 Lam/GramD1 StARkin domains bind sterols specifically, admitting and exporting the sterol  
11 molecule through an aperture at the end of their long axis as suggested by inspection of crystal  
12 structures (11-14) and also seen in the MD simulations reported here. Strikingly, the sterol  
13 binding pocket in these proteins is fractured along part of its length, exposing bound sterol to  
14 solvent. The analyses presented here describe a potentially general mechanism by which sterol  
15 egress (or entry) from Lam/GramD1 StARkin domains is controlled by the concomitant entry (or  
16 egress) of water molecules via this unusual lateral fracture.

17 Lam4S2 engages membranes via its  $\Omega_1$  loop and C-terminal helix, two structural regions  
18 identified previously as being functionally important in StART domains (11,12,17,18). Once  
19 membrane-bound, the protein adopts diverse conformations characterized by different extents  
20 of widening of the side-opening to the sterol binding pocket. The side-opening of the binding  
21 pocket in sterol-loaded Lam4S2 can be sealed by the polar side-chains of residues S181, D61,  
22 and K89, resulting in a low level of hydration within the cavity. In this condition, the cholesterol  
23 molecule is stably bound, with its hydroxyl group in hydrogen-bonding interactions with residue  
24 Q121. Cholesterol egress is triggered stochastically, by gradual widening of the side-opening  
25 and concomitant penetration of water into the binding site. These dynamic events destabilize  
26 cholesterol in the binding site by  $\sim 4$ -5 kcal/mole, driving it from the binding site towards the  
27 membrane. The subsequent steps of the release process are enabled by repositioning of the  $\Omega_1$   
28 loop away from the C-terminal helix. This fully exposes the binding pocket to the membrane,  
29 i.e. widens the axial aperture, thus creating a continuous passageway to the membrane. The  
30 sequence of events by which sterol exits Lam4S2 and enters the membrane is shown in **Figure**  
31 **2-movie supplement 1**.

32 The overall process of cholesterol release requires overcoming an energy barrier of  $\sim 6$   
33 kcal/mole energy barrier. This value is in a good agreement with the  $\sim 5$  kcal/mole estimate for  
34 energy barrier for sterol extraction (19) based on the assumption that intermembrane sterol  
35 transfer is rate limited by sterol pick-up/delivery processes and that the rate constant for this  
36 process can be described by simple Arrhenius relationship. Overall, the computational findings  
37 reported here reveal that the conformational state of the side-opening to the sterol binding  
38 cavity in Lam4S2 StARkin domain plays a major role in regulating the energetic stability of the  
39 sterol in the pocket.

40 This prediction was probed first computationally by analyzing MD trajectories of Lam4S2 in  
41 which residues that line the side-entrance to the binding site were substituted with alanine. For  
42 all three mutations (S181A, D61A and K89A) we found destabilization of cholesterol in the  
43 binding site. Using potential of mean force calculations, we found that the K89A mutation

1 lowered the energy barrier for cholesterol release by ~2-fold compared with wild type Lam4S2.  
2 Experimental tests confirmed that the K89A mutant was non-functional, whereas the S181A  
3 mutant was only partially compromised in its ability to bind sterol, a defect that did not appear  
4 to influence its ability to rescue the nystatin-sensitivity of *lam2Δ* cells or exchange sterols  
5 between membranes *in vitro*. Our test of the D61A mutant was limited to a cell-based assay  
6 where it performed as well as wild-type protein in rescuing the nystatin-sensitivity of *lam2Δ*  
7 cells.

8 Considering the functional importance of K89, and to a lesser extent S181, we examined the  
9 conservation of these residues in the Lam/GramD1 family using a previously reported structure-  
10 based sequence alignment (12). We found that the positions aligning with K89 and S181 were  
11 among the residues with the highest conservation score. Interestingly, it was noted that the  
12 side-chain of residue K910 in the S1 domain of Lam2 (Lam2S1), which aligns with K89 of Lam4S2  
13 (note that K89 in Lam4S2 corresponds to K1031 in the full-length protein (**Table 1**)), is  
14 positioned slightly differently in the ergosterol-bound and *apo* structures (12). This led to a  
15 speculation that a path for ergosterol movement into and out of Lam2S1 could be enabled by  
16 movement of K910. Consistent with this, our study reveals that residue K89 in Lam4S2 indeed  
17 repositions when cholesterol is released from the protein. Importantly, we find that this  
18 movement is a part of larger-scale dynamic changes involving neighboring polar residues, D61  
19 and S181, that lead to widening of the side-opening to the binding pocket.

20 Our computational analysis points to the key role that solvation of the sterol binding pocket  
21 plays in the process of cholesterol release. We find that water penetration destabilizes  
22 hydrogen-bonding interactions between the 3-β-OH of cholesterol and the side-chain of Q121,  
23 leading to initiation of sterol egress. While the current computations have not directly  
24 addressed the mechanism of sterol *entry* into the binding site, the PMF profile that we report  
25 here suggests that the continuous water pathway connecting the binding site to the bulk  
26 solution, as observed in our simulations of the Lam4S2 under sterol-free conditions, should play  
27 an important role in the delivery of sterol into the binding site. In this respect, we note that  
28 while in some X-ray structures of Lam/GramD1 StARkin domains the polar head-group of the  
29 bound sterol is seen in direct contact with neighboring polar residues, in the others it is  
30 engaged with the protein indirectly, through water-mediated interactions. The former mode is  
31 observed in Lam4S2, Lam2S2 and GramD1a, while the latter mode is seen in Lam2S1.  
32 Interestingly, in both Lam4S2 and Lam2S2 the head-group of the bound sterol hydrogen-bonds  
33 to the side-chain of a Gln residue (Q121 in Lam4S2). In Lam2S1, on the other hand, the position  
34 aligning with Q121 is occupied by small-size polar residue, Ser. Therefore, the head-group of  
35 the sterol does not form a direct hydrogen bond within the binding pocket of Lam2S1 but  
36 rather associates with the protein through water-mediated interactions. In GramD1a, in which  
37 the residue analogous to Q121 of Lam4S2 is also Ser, the bound sterol is seen in direct contact  
38 with another adjacent polar residue (Tyr). Taken together, the structural information highlights  
39 the importance of polar interactions for the stability of the sterol molecule in the binding site,  
40 consistent with our results demonstrating that disruption of these interactions by influx of  
41 water through the cavity side-opening leads to cholesterol release. Therefore, the molecular  
42 mechanism of sterol release that we have identified in Lam4S2 is likely to be generalizable to  
43 the other StARkin domains.

44

## 1 **Materials and methods**

2

### 3 **Computational methods**

#### 4 **Molecular constructs of wild type Lam4S2**

5 The computations were based on the X-ray structures of the second StArkin domain of Lam4,  
6 Lam4S2 (PDBIDs 6BYM and 6BYD) (11). In the 6BYM structure, Lam4S2 (residue sequence 4-196  
7 in the numbering used in Ref. (11), i.e. residue 4 corresponds to Thr-946 in native Lam4) is in  
8 complex with 25-hydroxycholesterol, which is bound in the canonical sterol binding pocket  
9 identified also in the StArkin domains of other Lam proteins (12,13). In the 6BYD model Lam4S2  
10 (residue sequence 4-200) is in the *apo* form. For the computational studies described here, the  
11 oxysterol in the 6BYM structure was replaced by cholesterol and the molecular models of  
12 Lam4S2 in both 6BYM and 6BYD structures were completed using modeller 9v1 (20) to add  
13 respective missing residue stretches, i.e. 1-3 and 197-203 to the 6BYM structure, and 1-3 and  
14 201-203 to the 6BYD structure.

15

#### 16 **Unbiased MD simulations of sterol-bound wild type Lam4S2**

17 An all-atom model lipid membrane with the composition of “Acceptor” liposomes in sterol  
18 transport assays (11), was prepared using the CHARMM-GUI web server (21). Thus, symmetric  
19 lipid bilayer containing 70% DOPC, 15% PI, 10% DOPE, and 5% DOPS (400 lipids in total on the  
20 two leaflets) was assembled, solvated (using water/lipid number ratio of 50) and ionized with  
21 0.1M K<sup>+</sup>Cl<sup>-</sup> salt. This system was subjected to MD simulations for 30 ns using NAMD version 2.12  
22 (22) and the standard multi-step equilibration protocol provided by CHARMM-GUI.

23 After this equilibration phase, the bilayer system was stripped of all water molecules and  
24 solution ions and the cholesterol-bound Lam4S2 domain (6BYM) was placed near the  
25 membrane surface so that the distance between any atom of the protein and any atom of the  
26 lipid molecules was  $\geq 10\text{\AA}$  (see **Figure 1B**). The protein-membrane complex was solvated (using  
27 water/lipid number ratio of  $\sim 145$ ) and ionized (with 0.1M K<sup>+</sup>Cl<sup>-</sup> salt). The resulting system  
28 contained  $\sim 234,000$  atoms in total.

29 The Lam4S2-membrane complex was equilibrated using a multi-step protocol (23) during  
30 which the backbone of the protein was first harmonically constrained and subsequently  
31 gradually released in three steps of 5 ns each, changing the restraining force constants from 1,  
32 to 0.5, and 0.1 kcal/ (mol  $\text{\AA}^2$ ), respectively. This step was followed by 6 ns long unbiased MD  
33 simulations carried out using the NAMD 2.12 package. After this short run, the velocities of all  
34 the atoms were reset and the system was simulated with ACEMD software (24) in 10  
35 statistically independent replicates (Stage 1 ensemble simulations), each for 320 ns, resulting in  
36 a cumulative time of 3.2  $\mu\text{s}$  for Stage 1 runs.

37 As described in Results, Stage 1 simulations sampled events of spontaneous binding of  
38 Lam4S2 to the membrane. We randomly selected 10 frames from Stage 1 trajectories in which  
39 Lam4S2 was seen to be interacting with the lipid bilayer as in **Figure 1E**, and initiated a new set  
40 of simulations with ACEMD (Stage 2 ensemble simulations) in which the 10 chosen structures  
41 were run in 10 statistically independent replicates each (i.e. 100 independent simulations). Each  
42 of the 100 copies were simulated for 375 ns resulting in a cumulative time of 37.5  $\mu\text{s}$  for Stage 2  
43 runs.

44

## 1 **Unbiased MD simulations of *apo* wild type Lam4S2**

2 Simulations of the *apo* wild type Lam4S2 protein (6BYD) followed the same protocol as  
3 described above for Stage 1 simulations of sterol-bound Lam4S2 with the only difference being  
4 the lipid membrane composition. Thus, in the manner identical to the sterol-bound Lam4S2,  
5 the *apo* protein was placed near the surface of the all-atom model lipid membrane (assembled  
6 with CHARMM-GUI) with the composition of “Donor” liposomes in sterol transport assays (11).  
7 This symmetric bilayer contained 31% DOPC, 23% DOPE, 23% DOPS, and 23% cholesterol (400  
8 lipids in total on the two leaflets). As the purpose of these simulations was to quantify solvation  
9 of the empty sterol binding site, this system was only considered for Stage 1 simulations  
10 (cumulative time of 3.2  $\mu$ s) and was not subjected to subsequent (Stage 2) phase.

11

## 12 **Unbiased MD simulations of the mutant Lam4S2 systems**

13 Using the FoldX server (25), three single mutations, K89A, S181A, and D79A in Lam4S2 were  
14 introduced into two separate frames of one of the Stage 2 ensemble trajectories of the wild  
15 type protein system (see Results). The resulting structures (two per mutant) were energy-  
16 minimized for 100 steps and then simulated in five independent replicates each for 150 ns using  
17 ACEMD. This resulted in 10 statistically independent MD trajectories per mutant totaling 1.5  $\mu$ s.

18

## 19 **Parameters and force-field for MD simulations**

20 All the simulations performed with NAMD 2.12 implemented *all* option for rigidbonds, 2fs  
21 integration time-step, PME for electrostatics interactions (26), and were carried out in NPT  
22 ensemble under semi-isotropic pressure coupling conditions, at a temperature of 310 K. The  
23 Nose-Hoover Langevin piston algorithm (22) was used to control the target  $P = 1$  atm pressure  
24 with the LangevinPistonPeriod set to 100 fs and LangevinPistonDecay set to 50 fs. The van der  
25 Waals interactions were calculated applying a cutoff distance of 12 Å and switching the  
26 potential from 10 Å. In addition, vdwforceswitching option was set to on.

27 The simulations carried out with ACEMD software implemented the PME method for  
28 electrostatic calculations, and were carried out according to the protocol developed at Acellera  
29 and implemented by us previously (24,27) with 4 fs integration time-step and the standard  
30 mass repartitioning procedure for hydrogen atoms. The computations were conducted under  
31 the NVT ensemble (at  $T=310$  K), using the Langevin Thermostat with Langevin Damping Factor  
32 set to 0.1.

33 For all the simulations the CHARMM36 force field parameters for proteins, lipids, sterols,  
34 and ions (28,29) were used.

35

## 36 **Umbrella sampling MD simulations of wild type and K89A Lam4S2**

37 Biased MD simulations of cholesterol release from the wild type and the K89A mutant Lam4S2  
38 were performed using umbrella sampling approach. The position of the translocated  
39 cholesterol was restrained to different locations along the translocation pathway (see Results)  
40 using as a collective variable the z-directional distance,  $d_{Z(\text{chol-121})}$  (along the axis perpendicular  
41 to the membrane plane), between the cholesterol oxygen and the  $C_{\alpha}$  atom of residue Q121 (see  
42 **Figure 1A**). 19 windows spaced 1Å apart in the range of  $d_{Z(\text{chol-121})} \in [2\text{Å}; 20\text{Å}]$  were considered  
43 and the dynamics of the sterol molecule in each window was restrained by applying a force  
44 constant of  $2.5 \text{ kcal/mol} \cdot \text{Å}^2$ . The rest of the parameters for the umbrella sampling runs were as

1 follows: *width* – 2Å, and both *lowerwallconstant* and *upperwallconstant* set to 25 kcal/mol · Å<sup>2</sup>.  
2 Each umbrella window was simulated for 50 ns which resulted in good overlap between  
3 adjacent windows (*Figure 4-figure supplement 9A, B*).

4 The potential of mean force (PMF) along the collective variable was constructed with  
5 Weighted Histogram Analysis Method (WHAM) Version 2.0.9 (30). For the WHAM calculations  
6 only the last 25 ns trajectory segments of each umbrella window were used. The tolerance  
7 parameter was set to 0.0001. To estimate error bars on the PMF, for each umbrella window  
8 first decorrelation time was calculated as a time-constant from a single exponential fit to the  
9 auto-correlation vs time data (*Figure 4-figure supplement 9C, D*). The error bars were then  
10 constructed with Monte Carlo bootstrapping error analysis in the WHAM software on the  
11 decorrelated data points using *num\_MC\_trials* of 1000.

12

### 13 **Dimensionality reduction using the time-structure based independent component analysis** 14 **(tICA)**

15 To facilitate analysis of cholesterol release process from Lam4S2 domain in the MD simulations,  
16 we performed dimensionality reduction using the tICA approach (31)(32,33)(34) as described  
17 previously (35-37). To define the tICA space we used several dynamic variables extracted from  
18 the analysis of the ensemble MD trajectories that quantify the dynamics of the cholesterol, the  
19 extent of exposure of the sterol binding site to the solvent, and the dynamics of the functionally  
20 important  $\Omega_1$  loop. These variables include (see *Figure 1A*): (1)-the minimum distance between  
21 the hydroxyl oxygen atom of the translocated cholesterol and residue Q121 ( $d_{\text{chol-121}}$ ); (2)-the  
22 root-mean-square deviation (RMSD) of the cholesterol molecule from its position in the binding  
23 site; (3)- distance between the hydroxyl oxygen of S181 and C<sub>γ</sub> carbon of D61 ( $d_{61-181}$ ); (4)- C<sub>α</sub> –  
24 C<sub>α</sub> distance between residue I95 in the  $\Omega_1$  loop and residue A169 in the C-terminal helix ( $d_{95-169}$ );  
25 (5)-number of water molecules in the interior of the protein (defined as number of water  
26 oxygens found within 5Å of the side-chains of the following protein residues – 189, 185, 181,  
27 154, 152, 136, 138, 140, 142, 123, 121, 119, 117, 102, 104, 106, 108, but farther than 5Å from  
28 the following residues – 116, 118, 109, 86, 103, 105); (6)-the number of lipid phosphate atoms  
29 with 3Å of the translocated cholesterol molecule.

30 Using these six CV-s as components of the data vector  $\mathbf{X}$ , the slowest reaction coordinates  
31 of a system were found as described previously (35,37,38), by constructing a time-lagged  
32 covariance matrix (TLCM):  $\mathbf{C}_{\tau}(\tau) = \langle \mathbf{X}(t)\mathbf{X}^T(t+\tau) \rangle$  and the covariance matrix  $\mathbf{C} = \langle \mathbf{X}(t)\mathbf{X}^T(t) \rangle$ , where  
33  $\mathbf{X}(t)$  is the data vector at time  $t$ ,  $\tau$  is the lag-time of the TLCM, and the symbol  $\langle \dots \rangle$  denotes the  
34 time average. The slowest reaction coordinates are then identified by solving the generalized  
35 eigenvalue problem:  $\mathbf{C}\mathbf{T}\mathbf{L}\mathbf{V} = \mathbf{C}\mathbf{V}\mathbf{\Lambda}$ , where  $\mathbf{\Lambda}$  and  $\mathbf{V}$  are the eigenvalue and eigenvector matrices,  
36 respectively. The eigenvectors corresponding to the largest eigenvalues define the slowest  
37 reaction coordinates.

38

## 39 **Experimental methods**

40

### 41 **Lam4S2 mutants**

42 Point mutants of Lam4S2 (D61A, K89A and S181A) were generated by PCR mutagenesis and  
43 confirmed by sequencing. The constructs and PCR primers are detailed in *Table 1* and *Table 2*.

44

## 1 Protein expression and purification

2 Lam4S2 and point mutants were expressed in *E. coli* as His-tagged proteins (**Table 1**), and  
3 purified by affinity chromatography on Ni-NTA resin, followed by size exclusion  
4 chromatography (SEC) using a Superdex 200 Increase 15/300GL column. The purification  
5 procedure was as previously described (11), except that the proteolysis step to remove the  
6 affinity tag was omitted and SEC was carried out in 20 mM HEPES, pH 7.5, 150 mM NaCl. The  
7 purified protein was snap frozen in small aliquots and stored at -80°C. Prior to use, aliquots  
8 were thawed and subjected to brief microcentrifugation to remove any aggregated material.  
9 Purified proteins were quantified by absorbance at 280 nm; quality control included analysis by  
10 circular dichroism (CD) as described (11), and re-analysis by SEC using buffer conditions as  
11 above.

## 12 Sterol transport assay

13 The assay (illustrated in **Figure 7A**) was performed and analyzed as previously described (11,39)  
14 using anionic donor and acceptor liposomes (donor lipid composition: DOPC, DOPE, DOPS, DHE  
15 (31, 23, 23, and 23 mol %); acceptor lipid composition: DOPC, DOPE, liver PI, DOPS, dansyl-PE  
16 (70, 7, 15, 5, and 3 mol %). Briefly, assays were carried out at 23°C in a quartz cuvette with  
17 constant stirring using a temperature-controlled Horiba Fluoromax Plus-C spectrofluorometer;  
18 the total sample volume was 2 ml, with 0.1 mM each of donor and acceptor liposomes (final  
19 concentration, based on measurement of inorganic phosphate after acid hydrolysis of the  
20 vesicles) and 0.05 μM or 0.1 μM Lam4S2 (final concentration) in 20 mM PIPES (pH 6.8), 3 mM  
21 KCl and 10 mM NaCl (assay buffer); fluorescence was monitored for ~2500 s using  $\lambda_{\text{ex}} = 310$  nm  
22 and  $\lambda_{\text{em}} = 525$  nm and a data acquisition frequency of 1 Hz. Acceptor liposomes were added to  
23 donor liposomes in the cuvette and after 60 sec, 200 μl of Lam4S2 (or Lam4S2-mutant), diluted  
24 as needed in assay buffer, was added. For control assays, 200 μl of assay buffer was added. All  
25 traces were offset corrected such that the fluorescence signal and time at the point of Lam4S2  
26 (or buffer) addition were each set to zero. The maximum possible FRET signal was determined  
27 from assays using 0.1 μM wild-type Lam4S2 where the fluorescence readout reached a plateau  
28 value within 2000 s; traces from such assays (done in replicate) were fit to a mono-exponential  
29 function, and the plateau value obtained (FRET<sub>max</sub>) was used to constrain the mono-exponential  
30 fits of all other traces. Traces from different assays were compiled after data fitting by setting  
31 FRET<sub>max</sub> = 1.  
32

## 33 Sterol extraction assay

34 Sucrose-loaded liposomes were prepared as follows. Lipids (2 μmol total, of a mixture of DOPC,  
35 DOPE, DOPS, cholesterol (49, 23, 23, 5 mol %, containing a trace amount of [<sup>3</sup>H]cholesterol and  
36 *N*-rhodamine-DHPE) were dried in a glass screw-cap tube under a stream of nitrogen, then  
37 resuspended in 1 ml assay buffer (20 mM PIPES (pH 6.8), 3 mM KCl, 10 mM NaCl) supplemented  
38 with 250 mM sucrose, by agitating on a Vibrax orbital shaker for 30 min at 1200 rpm. The  
39 resulting suspension was subjected to 5 cycles of freeze-thaw (immersion in liquid nitrogen,  
40 followed by thawing at room temperature), before being extruded 11 times through a 200-nm  
41 membrane filter using the Avanti Mini-Extruder. After extrusion, extravesicular sucrose was  
42 removed by diluting the vesicles 4x in assay buffer and centrifuging in a Beckman TLA100.3  
43 rotor (75,000 rpm, 1 h, 4°C). The supernatant was carefully removed from the pelleted vesicles  
44

1 (easily discernable because of their pink color due to rhodamine-DHPE), before resuspending  
2 the vesicles in 1 ml of assay buffer. Aliquots of the sample (5  $\mu$ l) were removed at different  
3 points of preparation (after the freeze-thaw step, post-extrusion and after final resuspension)  
4 and taken for liquid scintillation counting to track lipid recovery by monitoring [ $^3$ H]cholesterol.

5 The ability of Lam4S2 (wild-type and point mutants) to extract cholesterol from the vesicles  
6 was determined as follows. Liposomes (15  $\mu$ l,  $\sim$ 1500 pmol cholesterol) and protein (500-750  
7 pmol, as indicated) were combined in assay buffer to a total volume of 500  $\mu$ l. The mixture was  
8 incubated at room temperature for 1 h, before removing a 20  $\mu$ l aliquot for liquid scintillation  
9 counting. The remainder of the sample was centrifuged in a Beckman TLA100.2 rotor (75,000  
10 rpm, 1 h, 4°C). Most of the supernatant (350  $\mu$ l) was transferred to a fresh 1.5 ml tube, while  
11 the remainder was removed immediately and discarded. The pellet was resuspended in 100  $\mu$ l  
12 assay buffer containing 5% (w/v) SDS. Duplicate aliquots (50  $\mu$ l each) of the supernatant were  
13 taken for liquid scintillation counting to determine the amount of extracted cholesterol. Protein  
14 in the remainder of the supernatant (250  $\mu$ l) and the resuspended pellet was precipitated by  
15 adding 1.2 ml ice-cold acetone, followed by overnight incubation at -20°C. The precipitated  
16 proteins were pelleted by centrifugation, air-dried after removal of the acetone, and dissolved  
17 in SDS gel loading buffer. The relative amount of protein in the supernatant and pellet fractions  
18 was determined by SDS-PAGE, Coomassie staining and quantification of band intensity using  
19 Image J software. The data are represented as pmol cholesterol extracted / pmol protein in the  
20 supernatant.

21

## 22 **Acknowledgements**

23 We thank Tim Levine and Ganiyu Alli-Balogun (Department of Cell Biology, University College  
24 London Institute of Ophthalmology) for plasmids, Trudy Ramlall (Eliezer laboratory, Weill  
25 Cornell Medical College) for help with protein purification, and Harel Weinstein for insightful  
26 comments on the manuscript. The computational work was performed using resources of the  
27 Oak Ridge Leadership Computing Facility (ALCC allocation BIP109 and Director's Discretionary  
28 allocation) at the Oak Ridge National Laboratory, which is supported by the Office of Science of  
29 the U.S. Department of Energy under contract no. DE-AC05-00OR22725, and the computational  
30 resources of the David A. Cofrin Center for Biomedical Information in the HRH Prince Alwaleed  
31 Bin Talal Bin Abdulaziz Alsaud Institute for Computational Biomedicine at Weill Cornell Medical  
32 College.

33

## 34 **Additional Information**

### 35 **Funding**

| Funder                        | Grant reference number | Author             |
|-------------------------------|------------------------|--------------------|
| National Institutes of Health | R37AG019391            | David Eliezer      |
| 1923 Fund                     |                        | George Khelashvili |

36

37 The funders had no role in study design, data collection and interpretation, or the decision to  
38 submit the work for publication.

39

### 40 **Author contributions**

1 George Khelashvili, Conceptualization, Formal analysis, Investigation, Methodology, Writing—  
2 original draft, Writing—review and editing; Kalpana Pandey, Neha Chauhan, Formal analysis,  
3 Investigation, Methodology, Writing—review and editing; David Eliezer, Conceptualization,  
4 Writing—review and editing; Anant K Menon, Conceptualization, Formal analysis,  
5 Methodology, Supervision, Project administration, Writing—original draft, Writing—review and  
6 editing

7

8 [Author ORCIDs](#)

9 Neha Chauhan <https://orcid.org/0000-0003-1497-3359>

10 David Eliezer <https://orcid.org/0000-0002-1311-7537>

11 George Khelashvili <https://orcid.org/0000-0001-7235-8579>

12 Anant Kumar Menon <https://orcid.org/0000-0001-6924-2698>

13 Kalpana Pandey <https://orcid.org/0000-0002-7048-0690>



## 1 References

- 2 1. Maxfield, F. R., and van Meer, G. (2010) Cholesterol, the central lipid of mammalian cells. *Curr*  
3 *Opin Cell Biol* **22**, 422-429
- 4 2. Menon, A. K. (2018) Sterol gradients in cells. *Curr Opin Cell Biol* **53**, 37-43
- 5 3. Holthuis, J. C., and Menon, A. K. (2014) Lipid landscapes and pipelines in membrane  
6 homeostasis. *Nature* **510**, 48-57
- 7 4. Wong, L. H., Gatta, A. T., and Levine, T. P. (2019) Lipid transfer proteins: the lipid commute via  
8 shuttles, bridges and tubes. *Nat Rev Mol Cell Biol* **20**, 85-101
- 9 5. Wong, L. H., and Levine, T. P. (2016) Lipid transfer proteins do their thing anchored at  
10 membrane contact sites... but what is their thing? *Biochem Soc Trans* **44**, 517-527
- 11 6. Alpy, F., and Tomasetto, C. (2005) Give lipids a START: the StAR-related lipid transfer (START)  
12 domain in mammals. *J Cell Sci* **118**, 2791-2801
- 13 7. Gatta, A. T., Wong, L. H., Sere, Y. Y., Calderon-Norena, D. M., Cockcroft, S., Menon, A. K., and  
14 Levine, T. P. (2015) A new family of StART domain proteins at membrane contact sites has a role  
15 in ER-PM sterol transport. *Elife* **4**
- 16 8. Elbaz-Alon, Y., Eisenberg-Bord, M., Shinder, V., Stiller, S. B., Shimoni, E., Wiedemann, N., Geiger,  
17 T., and Schuldiner, M. (2015) Lam6 Regulates the Extent of Contacts between Organelles. *Cell*  
18 *Rep* **12**, 7-14
- 19 9. Murley, A., Sarsam, R. D., Toulmay, A., Yamada, J., Prinz, W. A., and Nunnari, J. (2015) Ltc1 is an  
20 ER-localized sterol transporter and a component of ER-mitochondria and ER-vacuole contacts. *J*  
21 *Cell Biol* **209**, 539-548
- 22 10. Sullivan, D. P., Georgiev, A., and Menon, A. K. (2009) Tritium suicide selection identifies proteins  
23 involved in the uptake and intracellular transport of sterols in *Saccharomyces cerevisiae*.  
24 *Eukaryot Cell* **8**, 161-169
- 25 11. Jentsch, J. A., Kiburu, I., Pandey, K., Timme, M., Ramlall, T., Levkau, B., Wu, J., Eliezer, D.,  
26 Boudker, O., and Menon, A. K. (2018) Structural basis of sterol binding and transport by a yeast  
27 StARkin domain. *J Biol Chem* **293**, 5522-5531
- 28 12. Horenkamp, F. A., Valverde, D. P., Nunnari, J., and Reinisch, K. M. (2018) Molecular basis for  
29 sterol transport by StART-like lipid transfer domains. *EMBO J* **37**
- 30 13. Tong, J., Manik, M. K., and Im, Y. J. (2018) Structural basis of sterol recognition and nonvesicular  
31 transport by lipid transfer proteins anchored at membrane contact sites. *Proc Natl Acad Sci U S*  
32 *A* **115**, E856-E865
- 33 14. Sandhu, J., Li, S., Fairall, L., Pfisterer, S. G., Gurnett, J. E., Xiao, X., Weston, T. A., Vashi, D., Ferrari,  
34 A., Orozco, J. L., Hartman, C. L., Strugatsky, D., Lee, S. D., He, C., Hong, C., Jiang, H., Bentolila, L.  
35 A., Gatta, A. T., Levine, T. P., Ferng, A., Lee, R., Ford, D. A., Young, S. G., Ikonen, E., Schwabe, J.  
36 W. R., and Tontonoz, P. (2018) Aster Proteins Facilitate Nonvesicular Plasma Membrane to ER  
37 Cholesterol Transport in Mammalian Cells. *Cell* **175**, 514-529 e520
- 38 15. Quon, E., Sere, Y. Y., Chauhan, N., Johansen, J., Sullivan, D. P., Dittman, J. S., Rice, W. J., Chan, R.  
39 B., Di Paolo, G., Beh, C. T., and Menon, A. K. (2018) Endoplasmic reticulum-plasma membrane  
40 contact sites integrate sterol and phospholipid regulation. *PLoS Biol* **16**, e2003864
- 41 16. Roelants, F. M., Chauhan, N., Muir, A., Davis, J. C., Menon, A. K., Levine, T. P., and Thorner, J.  
42 (2018) TOR complex 2-regulated protein kinase Ypk1 controls sterol distribution by inhibiting  
43 StARkin domain-containing proteins located at plasma membrane-endoplasmic reticulum  
44 contact sites. *Mol Biol Cell* **29**, 2128-2136
- 45 17. Gatta, A. T., Sauerwein, A. C., Zhuravleva, A., Levine, T. P., and Matthews, S. (2018) Structural  
46 insights into a StART-like domain in Lam4 and its interaction with sterol ligands. *Biochem*  
47 *Biophys Res Commun* **495**, 2270-2274

- 1 18. laea, D. B., Dikiy, I., Kiburu, I., Eliezer, D., and Maxfield, F. R. (2015) STARD4 Membrane  
2 Interactions and Sterol Binding. *Biochemistry* **54**, 4623-4636
- 3 19. Dittman, J. S., and Menon, A. K. (2017) Speed Limits for Nonvesicular Intracellular Sterol  
4 Transport. *Trends Biochem Sci* **42**, 90-97
- 5 20. Eswar, N., Webb, B., Marti-Renom, M. A., Madhusudhan, M. S., Eramian, D., Shen, M. Y., Pieper,  
6 U., and Sali, A. (2006) Comparative protein structure modeling using Modeller. *Curr Protoc*  
7 *Bioinformatics* **Chapter 5**, Unit 5 6
- 8 21. Jo, S., Lim, J. B., Klauda, J. B., and Im, W. (2009) CHARMM-GUI Membrane Builder for Mixed  
9 Bilayers and Its Application to Yeast Membranes. *Biophysical Journal* **97**, 50-58
- 10 22. Phillips, J. C., Braun, R., Wang, W., Gumbart, J., Tajkhorshid, E., Villa, E., Chipot, C., Skeel, R. D.,  
11 Kale, L., and Schulten, K. (2005) Scalable molecular dynamics with NAMD. *Journal of*  
12 *Computational Chemistry* **26**, 1781-1802
- 13 23. Shi, L., Quick, M., Zhao, Y., Weinstein, H., and Javitch, J. A. (2008) The mechanism of a  
14 neurotransmitter:sodium symporter--inward release of Na<sup>+</sup> and substrate is triggered by  
15 substrate in a second binding site. *Mol Cell* **30**, 667-677
- 16 24. Harvey, M. J., Giupponi, G., and Fabritiis, G. D. (2009) ACEMD: Accelerating Biomolecular  
17 Dynamics in the Microsecond Time Scale. *J Chem Theory Comput* **5**, 1632-1639
- 18 25. Schymkowitz, J., Borg, J., Stricher, F., Nys, R., Rousseau, F., and Serrano, L. (2005) The FoldX web  
19 server: an online force field. *Nucleic acids research* **33**, W382-388
- 20 26. Essmann, U., Perera, L., Berkowitz, M. L., Darden, T., Lee, H., and Pedersen, L. G. (1995) A  
21 Smooth Particle Mesh Ewald Method. *Journal of Chemical Physics* **103**, 8577-8593
- 22 27. Khelashvili, G., Stanley, N., Sahai, M. A., Medina, J., LeVine, M. V., Shi, L., De Fabritiis, G., and  
23 Weinstein, H. (2015) Spontaneous inward opening of the dopamine transporter is triggered by  
24 PIP2-regulated dynamics of the N-terminus. *ACS Chem Neurosci* **6**, 1825-1837
- 25 28. Phillips, J. C., Braun, R., Wang, W., Gumbart, J., Tajkhorshid, E., Villa, E., Chipot, C., Skeel, R. D.,  
26 Kale, L., and Schulten, K. (2005) Scalable molecular dynamics with NAMD. *J Comput Chem* **26**,  
27 1781-1802
- 28 29. Lee, J., Cheng, X., Swails, J. M., Yeom, M. S., Eastman, P. K., Lemkul, J. A., Wei, S., Buckner, J.,  
29 Jeong, J. C., Qi, Y., Jo, S., Pande, V. S., Case, D. A., Brooks, C. L., 3rd, MacKerell, A. D., Jr., Klauda,  
30 J. B., and Im, W. (2016) CHARMM-GUI Input Generator for NAMD, GROMACS, AMBER,  
31 OpenMM, and CHARMM/OpenMM Simulations Using the CHARMM36 Additive Force Field. *J*  
32 *Chem Theory Comput* **12**, 405-413
- 33 30. Grossfield, A. WHAM: the weighted histogram analysis method", version 2.0.9,  
34 [http://membrane.urmc.rochester.edu/wordpress/?page\\_id=126](http://membrane.urmc.rochester.edu/wordpress/?page_id=126).
- 35 31. Molgedey, L., and Schuster, H. G. (1994) Separation of a mixture of independent signals using  
36 time delayed correlations. *Physical review letters* **72**, 3634-3637
- 37 32. Naritomi, Y., and Fuchigami, S. (2011) Slow dynamics in protein fluctuations revealed by time-  
38 structure based independent component analysis: the case of domain motions. *The Journal of*  
39 *chemical physics* **134**, 065101
- 40 33. Perez-Hernandez, G., Paul, F., Giorgino, T., De Fabritiis, G., and Noe, F. (2013) Identification of  
41 slow molecular order parameters for Markov model construction. *The Journal of chemical*  
42 *physics* **139**, 015102
- 43 34. Schwantes, C. R., and Pande, V. S. (2013) Improvements in Markov State Model Construction  
44 Reveal Many Non-Native Interactions in the Folding of NTL9. *J Chem Theory Comput* **9**, 2000-  
45 2009
- 46 35. Morra, G., Razavi, A. M., Pandey, K., Weinstein, H., Menon, A. K., and Khelashvili, G. (2018)  
47 Mechanisms of Lipid Scrambling by the G Protein-Coupled Receptor Opsin. *Structure* **26**, 356-  
48 367.e353

- 1 36. Lee, B. C., Khelashvili, G., Falzone, M., Menon, A. K., Weinstein, H., and Accardi, A. (2018) Gating  
2 mechanism of the lipid pathway in a TMEM16 scramblase. *Nature Communications* **9**, 3251
- 3 37. Razavi, A. M., Khelashvili, G., and Weinstein, H. (2018) How structural elements evolving from  
4 bacterial to human SLC6 transporters enabled new functional properties. *BMC biology* **16**, 31
- 5 38. Razavi, A. M., Khelashvili, G., and Weinstein, H. (2017) A Markov State-based Quantitative  
6 Kinetic Model of Sodium Release from the Dopamine Transporter. *Scientific reports* **7**, 40076
- 7 39. Chauhan, N., Jentsch, J. A., and Menon, A. K. (2019) Measurement of Intracellular Sterol  
8 Transport in Yeast. *Methods Mol Biol* **1949**, 115-136

9

**Table 1: Constructs and strains**

| Bacterial plasmids (all constructs are in the pTrcHis6A expression vector and start with the sequence MGGSHHHHHHGMASHHHHHHARALEVLFQGPM) |                                                                                                    |
|-----------------------------------------------------------------------------------------------------------------------------------------|----------------------------------------------------------------------------------------------------|
| Lam4S2 <sup>1</sup>                                                                                                                     | Lam4 946-1145                                                                                      |
| Lam4S2(D61A) <sup>3</sup>                                                                                                               | Lam4 946-1145 (D1003A)                                                                             |
| Lam4S2(K89A) <sup>3</sup>                                                                                                               | Lam4 946-1145 (K1031A)                                                                             |
| Lam4S2(S181A) <sup>3</sup>                                                                                                              | Lam4 946-1145 (S1123A)                                                                             |
| Yeast plasmids                                                                                                                          |                                                                                                    |
| GFP only <sup>2</sup>                                                                                                                   | pRS416 (CEN <i>URA3</i> ): GFP + GFP                                                               |
| GFP-Lam4S2 <sup>2</sup>                                                                                                                 | pRS416 (CEN <i>URA3</i> ): GFP + Lam4 946-1155 + DV <sup>4</sup>                                   |
| GFP-Lam4S2(D61A) <sup>3</sup>                                                                                                           | pRS416 (CEN <i>URA3</i> ): GFP + Lam4 946-1155 (D1003A) + DV <sup>4</sup>                          |
| GFP-Lam4S2(K89A) <sup>3</sup>                                                                                                           | pRS416 (CEN <i>URA3</i> ): GFP + Lam4 946-1155 (K1031A) + DV <sup>4</sup>                          |
| GFP-Lam4S2(S181A) <sup>3</sup>                                                                                                          | pRS416 (CEN <i>URA3</i> ): GFP + Lam4 946-1155 (S1123A) + DV <sup>4</sup>                          |
| Bacterial strain                                                                                                                        |                                                                                                    |
| <i>E. coli</i> EXPRESS BL21(DE3)                                                                                                        | F– <i>ompT hsdSB (rB- mB-) gal dcm lon λ</i> (DE3 [ <i>lacI lacUV5-T7 gene 1 ind1 sam7 nin5</i> ]) |
| Yeast strain                                                                                                                            |                                                                                                    |
| <i>lam2Δ</i> (also called <i>ysp2Δ</i> )                                                                                                | <i>MATa his3Δ1 leu2Δ0 met15Δ0 ura3Δ0 ysp2Δ::hphNT1</i>                                             |

<sup>1</sup> Described in Jentsch et al. *J. Biol. Chem.* **293**: 5522-5531 (2018)

<sup>2</sup> Described in Gatta et. al. *eLife* **4**: e07253 (2015)

<sup>3</sup> Parentheses indicate point mutations, e.g. K89A, using the Lam4S2 numbering system of Jentsch et al. (*J. Biol. Chem.* **293**: 5522-5531 (2018)); residue numbering based on the entire Lam4 sequence is provided in the right-hand column

<sup>4</sup> two amino acids (DV) appended to the end of the Lam4S2 sequence

1  
2

**Table 2: Primers used for mutagenesis**

| Mutation | Forward primer                               | Reverse primer                               |
|----------|----------------------------------------------|----------------------------------------------|
| D61A     | CAGAAAGTTATCACTAGAGCTAAGA<br>ATAATGTCAATGTGG | CCACATTGACATTATTCTTAGCTCTA<br>GTGATAACTTTCTG |
| K89A     | CACTATGAGTACACGGCGAAATTGA<br>ACAATTCTATC     | GATAGAATTGTTCAATTTCCGCCGTGT<br>ACTCATAGTG    |
| S181A    | GAGGGTCAGAAGGTTGCTGTCGAT<br>TACATGCTA        | TAGCATGTAATCGACAGCAACCTTCT<br>GACCCTC        |

3  
4

1 **Figures**

2

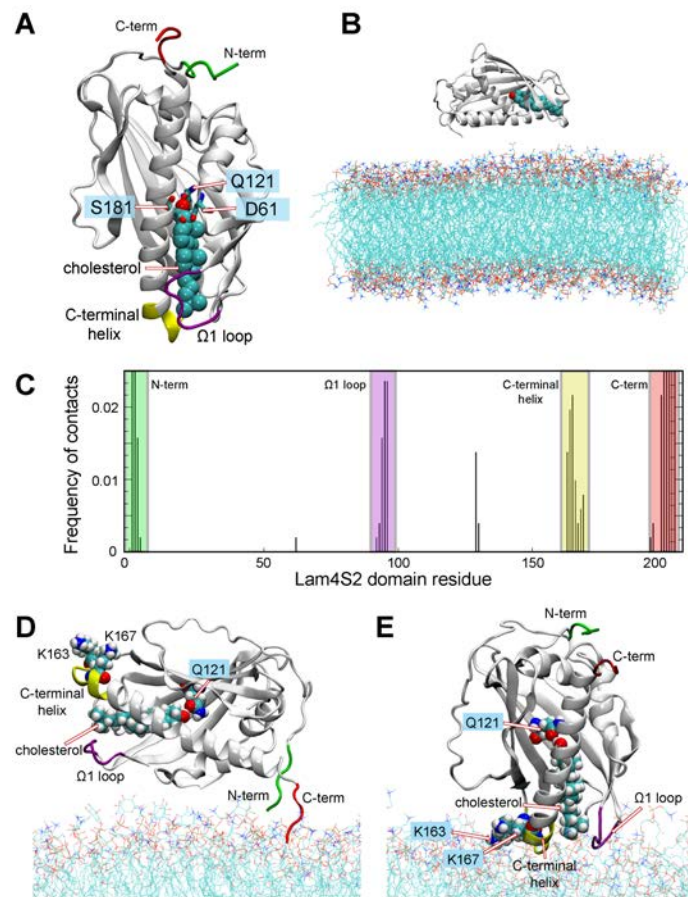

3

4

5 **Figure 1.** Different modes of Lam4S2-membrane association deduced from 'Stage 1' molecular  
6 dynamics simulations. **(A)** Structural elements of the Lam4S2 domain used to construct  
7 collective variables (CVs) for tICA analysis. Shown in licorice and labeled are residues Q121,  
8 S181, D61. Also highlighted are locations of the  $\Omega_1$  loop (purple), the C-terminal helix (yellow),  
9 the N-terminus (green), and the C-terminus (red). Cholesterol is shown in space filling  
10 representation colored cyan except for the oxygen atom in red **(B)** Initial positioning of Lam4S2  
11 (cartoon) near the membrane (lines). In this configuration, the distance between any atom of  
12 the protein and any atom of a lipid molecule was  $\geq 10\text{\AA}$ . The cholesterol molecule bound to  
13 Lam4S2 is shown in space-fill representation. The water box including solution ions are omitted  
14 for clarity. **(C)** For each residue of the Lam4S2, the fraction of trajectory frames from Stage 1  
15 simulations during which the residue is in contact with the membrane is plotted. A residue was  
16 considered in contact with the bilayer if the z-coordinate of the  $C_\alpha$  atom of this residue was  
17 within  $1\text{\AA}$  of the average z-position of the neighboring lipid phosphate atoms (identified as the  
18 ones located within  $10\text{\AA}$  of this  $C_\alpha$  atom). The relevant protein segments are labeled and  
19 colored using the color-code used in panel A. **(D-E)** Two modes of Lam4S2-membrane  
20 association. The lipids in the membrane are shown as lines. The relevant protein segments are  
21 labeled and colored using the color-code used in panel A. For completeness, panels D-E also  
22 show in space-fill the protein-bound cholesterol molecule, and residues K163, K167, and Q121.

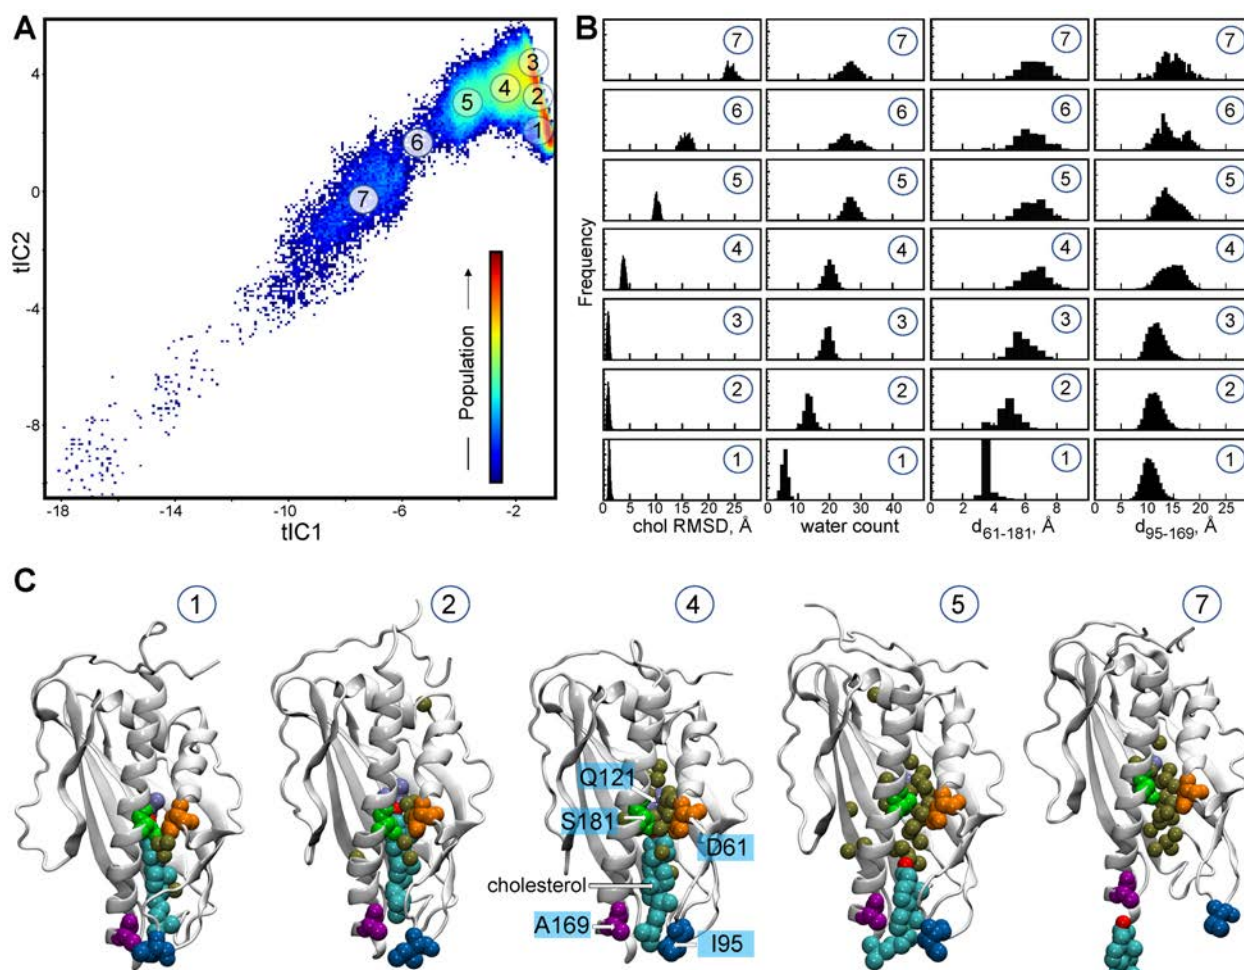

1  
2  
3 **Figure 2:** Mechanistic steps of cholesterol release from Lam4S2 revealed from tICA analysis. (A)  
4 2-D landscape representing all the Stage 2 MD trajectories mapped with the tICA  
5 transformation in the space of the first two tICA eigenvectors (tIC 1 and tIC 2). The lighter  
6 shades (from red to light green to yellow) indicate the most populated regions of the 2D space  
7 (see the color bar). Microstates representing the most populated states in these simulations are  
8 indicated by the numbered circles (1-7) and represent various stages in the lipid translocation  
9 process. (B) Structural characteristics of the selected 7 microstates. The columns record the  
10 probability distributions of the cholesterol RMSD, number of water oxygens in the sterol  
11 binding pocket, and distances between residues 61 and 181 ( $d_{61-181}$ ) and 95 and 169 ( $d_{95-169}$ ). (C)  
12 Structural models representing selected microstates. In these snapshots, Lam4S2 is shown in  
13 cartoon, and cholesterol as well as selected protein residues (Q121, D61, S181, I95, A169) are  
14 shown in space fill (the residues are labeled in the snapshot of Microstate 4). Water oxygens in  
15 the sterol binding site are drawn as gold spheres.  
16

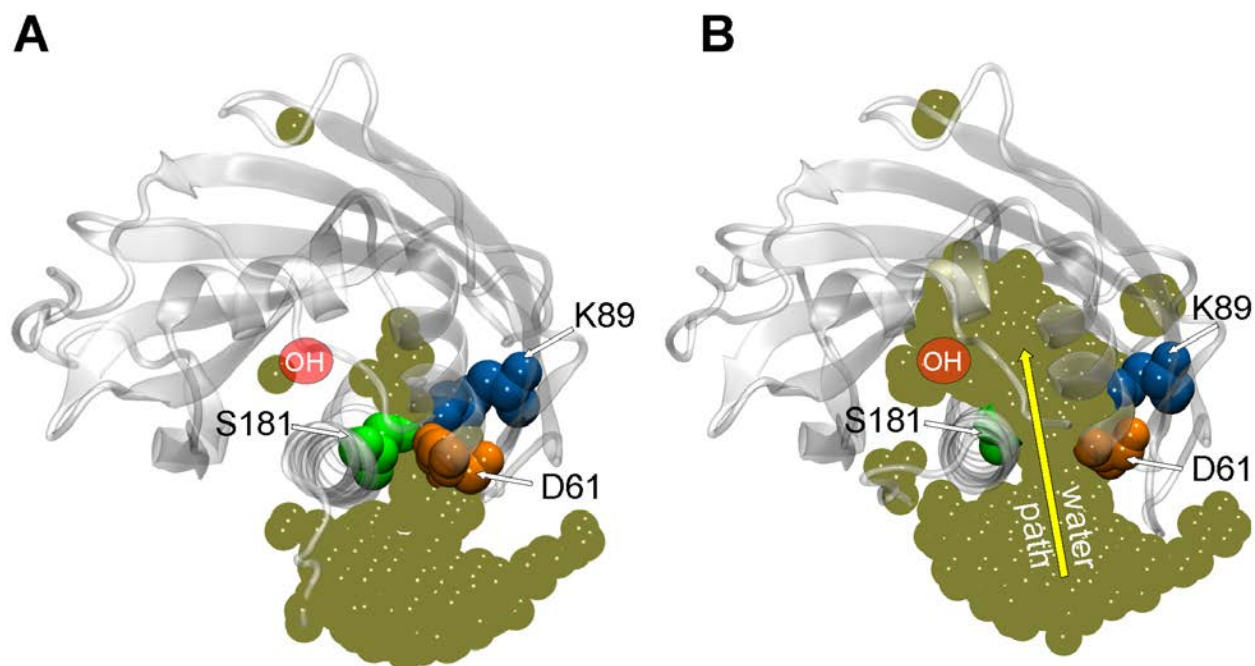

1  
2  
3 **Figure 3:** Penetration of water into the binding pocket through the side-opening is a key step in  
4 the sterol release process. (A-B) Top view of the sterol binding pocket in Lam4S2 illustrating  
5 closed (panel A) and open (panel B) conformations of the side-opening to the binding site (the  
6 protein models are representative structures from Microstates 1 and 7, respectively). In both  
7 snapshots, residues D61, K89, and S181 lining the side-opening are highlighted (in space-fill,  
8 colored and labeled). The gold spheres in panels A and B represent superposition of water  
9 oxygens in the binding site and near the side-entrance from one of the Stage 2 trajectories  
10 before (panel A) and after (panel B) the side-entrance opens. As a reference, the approximate  
11 location of the cholesterol hydroxyl group is indicated (red oval, marked OH). A water pathway  
12 to the binding pocket, formed under conditions of the open, but not closed, side-entrance is  
13 illustrated in panel B by the yellow arrow.

14  
15  
16  
17  
18

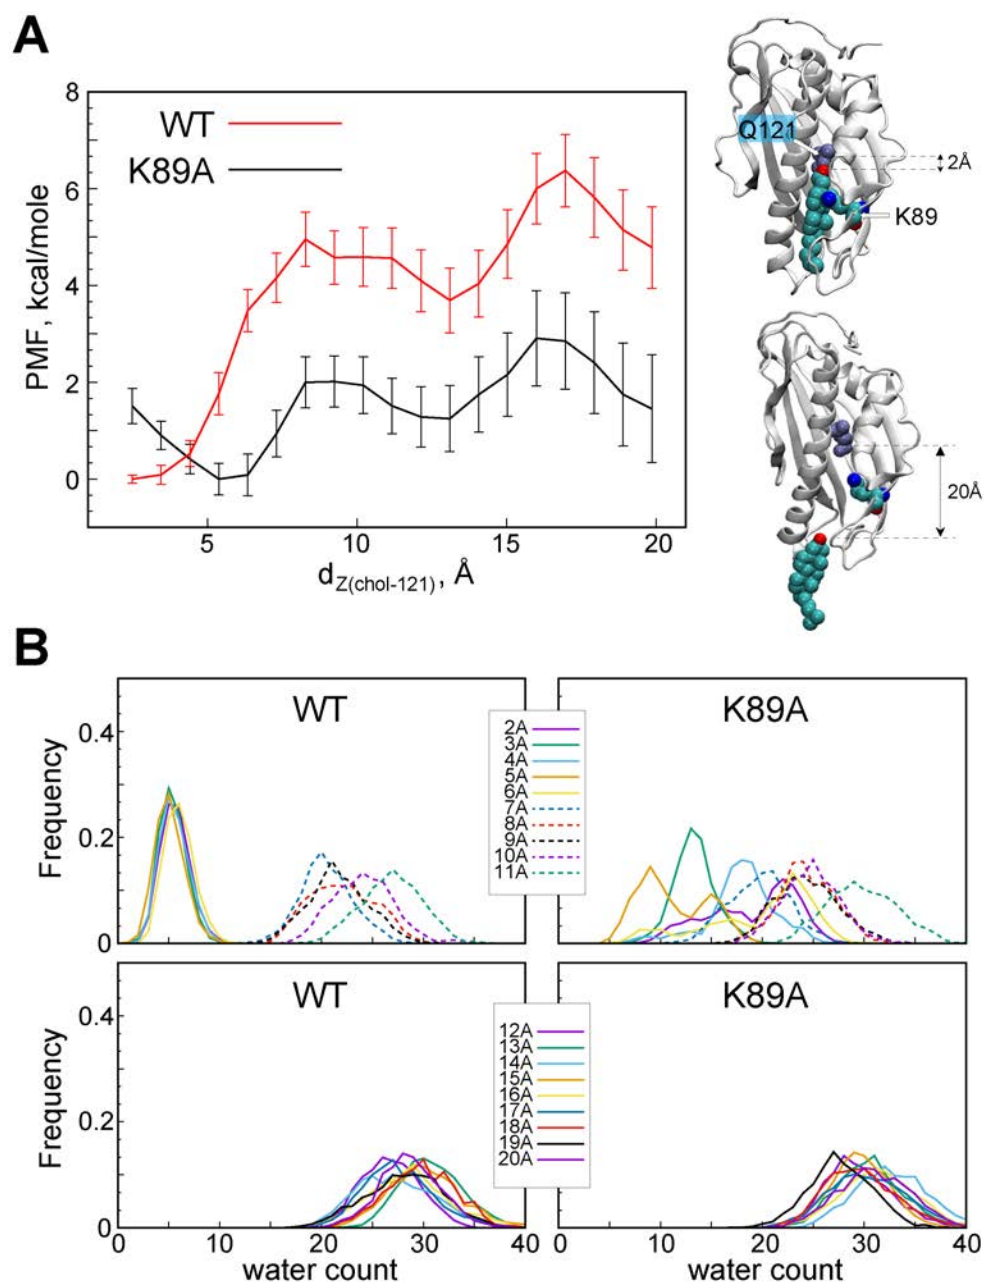

1  
2  
3  
4  
5  
6  
7  
8  
9  
10  
11  
12

**Figure 4:** The K89A mutation reduces the energy barrier for cholesterol release. **(A)** Potential of mean force (PMF) as a function of  $d_{Z(\text{chol-121})}$  distance for wild type (red) and K89A (black) Lam4S2 calculated from umbrella sampling MD simulations at each  $d_{Z(\text{chol-121})}$ . The structural representations on the right side of the panel illustrate locations of cholesterol corresponding to  $d_{Z(\text{chol-121})} \sim 2\text{Å}$  (top) and  $d_{Z(\text{chol-121})} \sim 20\text{Å}$  (bottom). Residues Q121 and K89 in these snapshots are also shown. **(B)** Histograms of number of water oxygens in the sterol binding site constructed from analysis of trajectories representing various windows in the range of  $d_{Z(\text{chol-121})} \in [2\text{Å}; 20\text{Å}]$  from the umbrella MD simulations of the wild type (left panels) and K89A (right panels) systems.



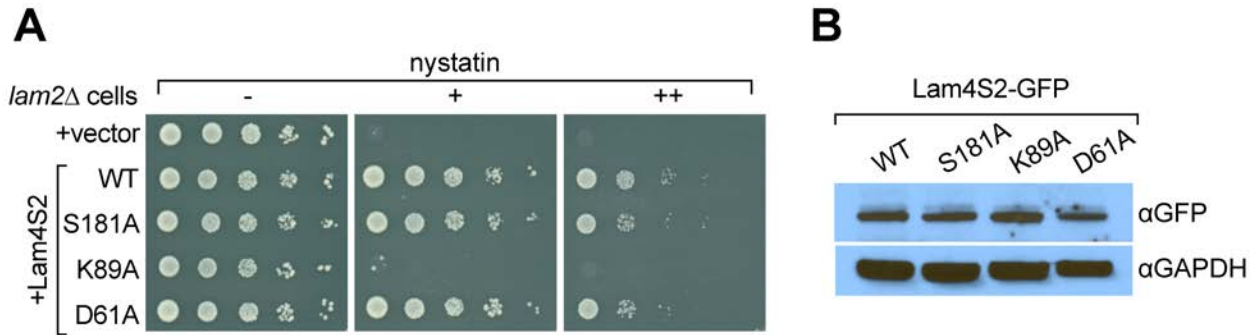

1  
2  
3 **Figure 5:** The Lam4S2(K89A) mutant does not rescue the nystatin sensitivity of *lam2Δ* cells. (A)  
4 Cells (*lam2Δ*) were transformed with an empty vector (top row) or with a vector for expression  
5 of GFP-Lam4S2 wild-type (WT) or mutants as indicated. Serial 10-fold dilutions were spotted  
6 onto agar plates containing defined minimal media (- uracil) lacking (-) or containing 2 μg/ml (+)  
7 or 8 μg/ml (++) nystatin. The plates were photographed after 72 h at room temperature. (B)  
8 Equivalent amounts of cytosol from *lam2Δ* cells expressing GFP-Lam4S2 wild-type or mutants  
9 were analyzed by SDS-PAGE and immunoblotting using anti-GFP antibodies to detect the fusion  
10 proteins and anti-GAPDH to verify equivalent loading.

11  
12

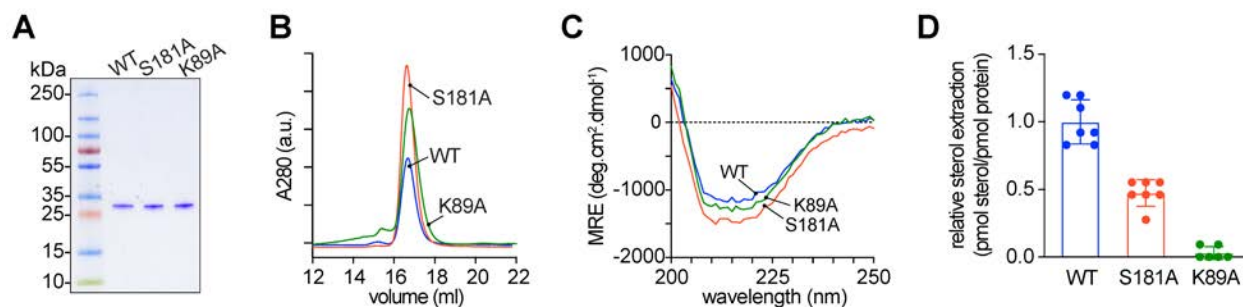

1  
2  
3 **Figure 6:** Purification and characterization of Lam4S2 mutants. (A) Lam4S2 wild-type and the  
4 S181A and K89A mutants were purified as His-tagged proteins via affinity chromatography and  
5 size-exclusion. The purified proteins were analyzed by SDS-PAGE (4-20% gradient gel) and  
6 Coomassie staining. (B) Size-exclusion analysis of purified proteins. (C) Circular dichroism  
7 spectra of purified proteins. Protein samples were 12  $\mu$ M and the spectra shown are the  
8 average of 3 scans per sample. (D) Sterol extraction by purified Lam4S2 and mutants. Sucrose-  
9 loaded liposomes (DOPC:DOPE:DOPS:cholesterol, 49:23:23:5 mol %, doped with  
10 [<sup>3</sup>H]cholesterol) were incubated with 750 pmol of purified proteins for 1 h at room  
11 temperature. After ultracentrifugation, the radioactivity and the protein amount in the  
12 supernatant was determined, and the stoichiometry of binding was calculated. Data are  
13 represented as mean  $\pm$  SEM (error bars; n = 5-7). Data are normalized to the value obtained for  
14 the wild-type protein ( $0.11 \pm 0.02$  pmol cholesterol/pmol protein (mean  $\pm$  standard deviation  
15 (n=6)).

16  
17  
18  
19  
20  
21  
22  
23  
24

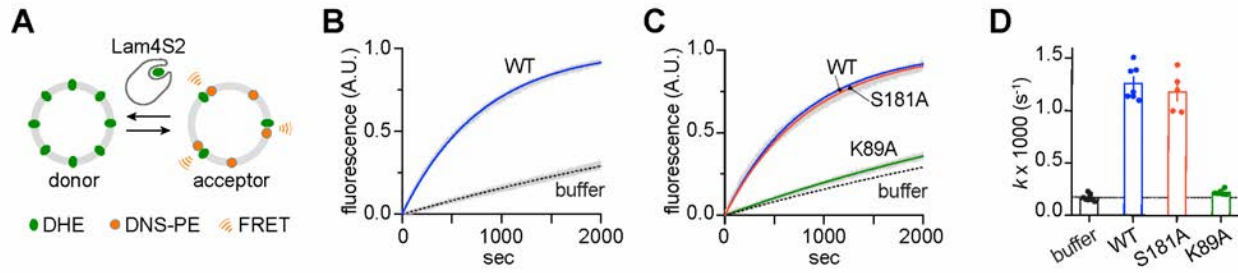

1  
2  
3 **Figure 7:** Sterol transfer activity of Lam4S2 mutants. **(A)** Schematic of the sterol transport assay.  
4 **(B)** Spontaneous sterol exchange between vesicles and transport catalyzed by wild-type Lam4S2  
5 ( $0.05 \mu\text{M}$ ); Traces ( $n=7-8$ ) were acquired from three independent experiments and averaged.  
6 The blue and dashed lines represent monoexponential fits of the averaged data; the grey bars  
7 graphed behind the fits represent the standard error of the mean (s.e.m.). **(C)** As in panel B,  
8 except that Lam4S2 mutants were tested ( $n=5-7$ ). The data fits for traces corresponding to  
9 spontaneous transport and transport catalyzed by the wild-type protein are taken from panel B  
10 and shown for comparison. **(D)** Rate constants (colored symbols) obtained from mono-  
11 exponential fits of individual traces from the experiments depicted in panels B and C. The bars  
12 show the mean and s.e.m. of the data.  
13

1 **Figure Supplements**

2

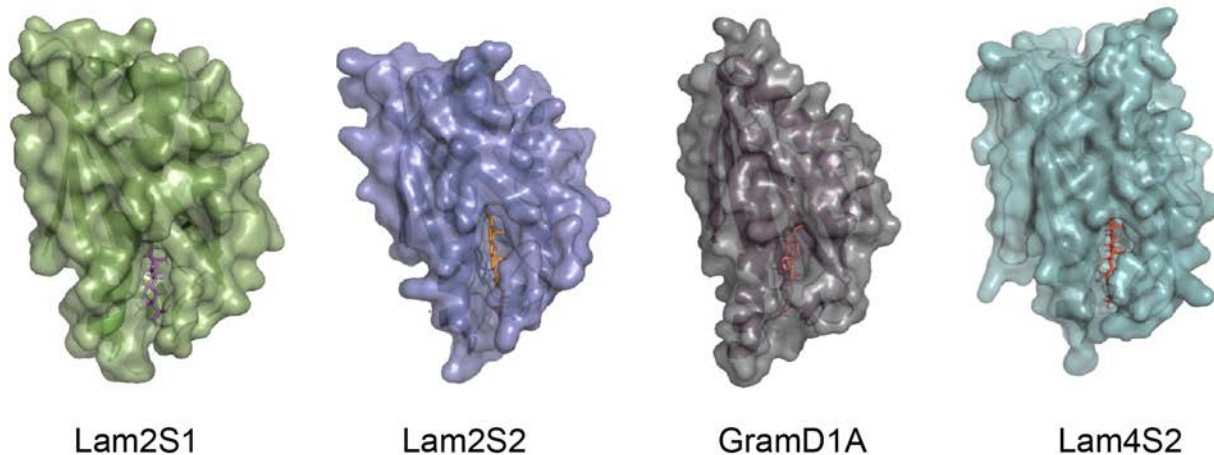

4

5

6 **Figure Supplement 1.** Crystal structures (surface representation) of Lam/GramD1 domains with  
7 bound sterol. The structures (PDB ID: 6CAY (Lam2S1), 5YS0 (Lam2S2), 6GQF (GramD1a), 6BYM  
8 (Lam4S2)) are oriented with their sterol entry/exit site at the bottom, and displaying the lateral  
9 fracture (side-opening) through which the bound sterol is visible from the bulk solvent.

9

1

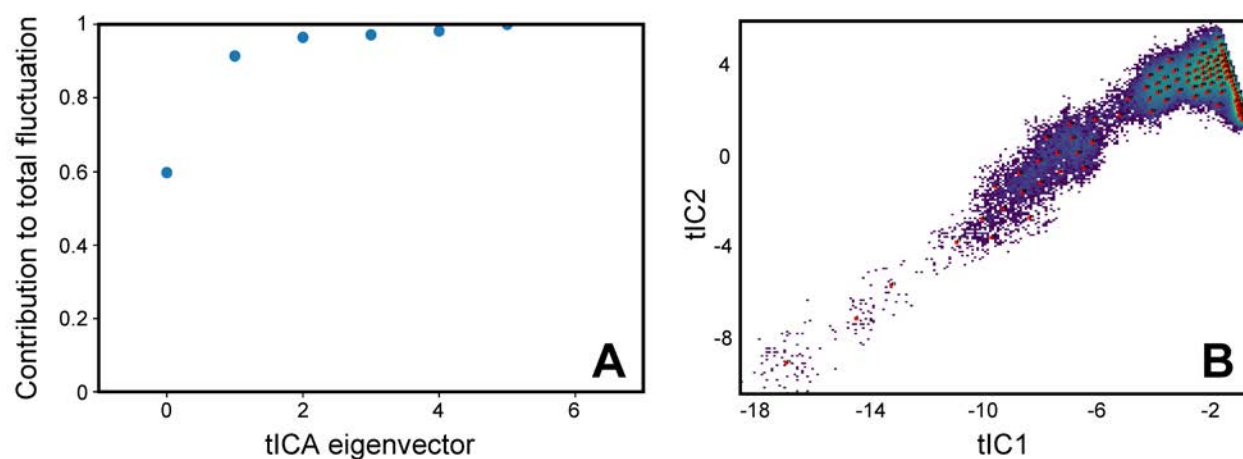

2  
3

4 **Figure Supplement 2:** tICA analysis of Stage 2 simulations. (A) Contribution of each tIC vector to  
5 the total fluctuation of the system in the Stage 2 simulations. (B) The full set of Stage 2  
6 trajectories mapped on the 2D landscape of the first two tICA eigenvectors (tIC 1 and tIC 2).  
7 Shown also are locations of the 100 microstates (red squares) obtained from the k-means  
8 clustering analysis of the conformational space. The lighter shades on the 2D space indicate the  
9 most populated regions (see also *Figure 2*).

10

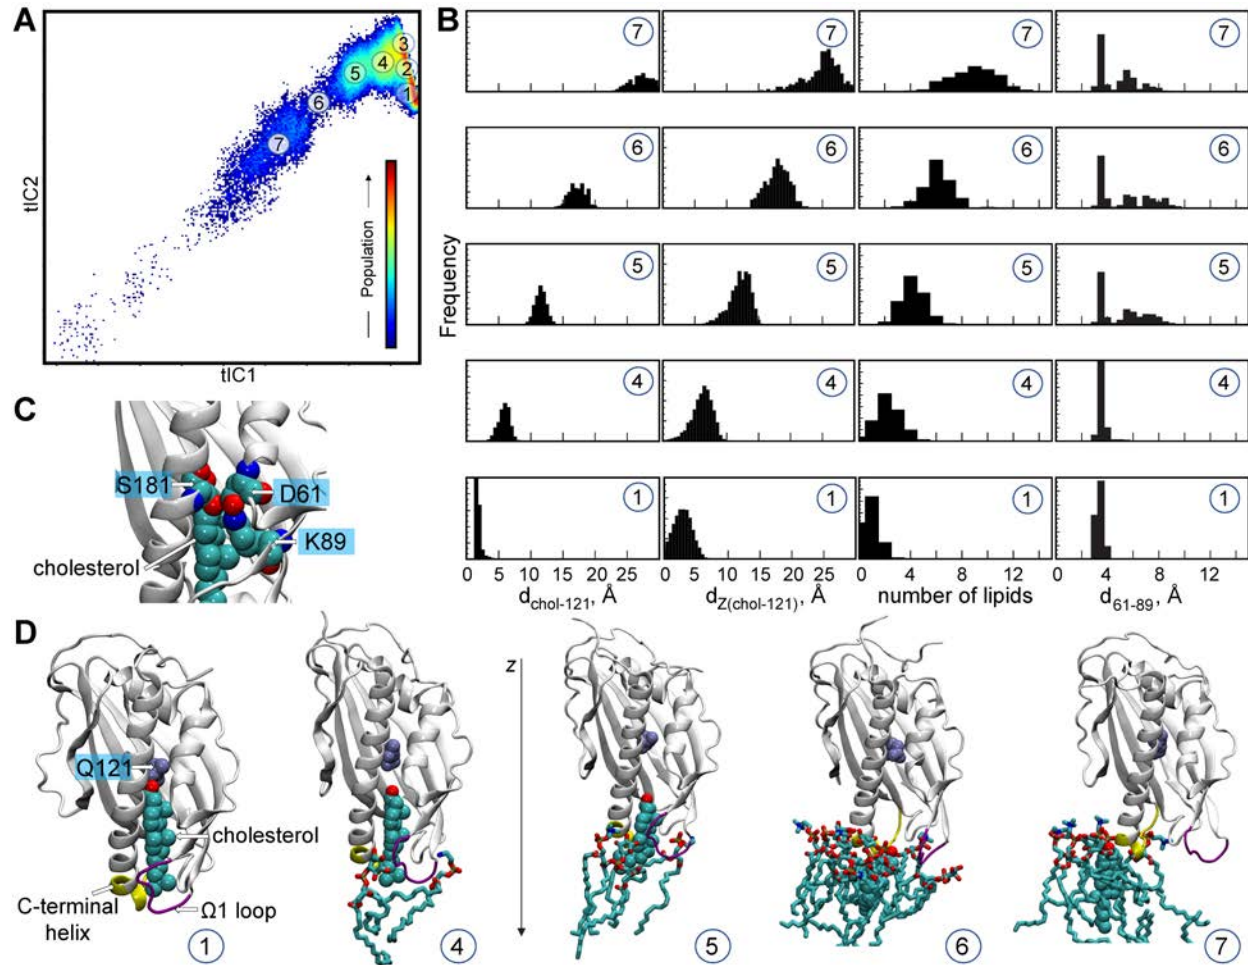

1  
2  
3  
4  
5  
6  
7  
8  
9  
10  
11  
12  
13  
14  
15  
16  
17  
18  
19  
20

**Figure Supplement 3:** Mechanistic steps of cholesterol release from Lam4S2 revealed from tICA analysis. **(A)** 2-D landscape re-drawn from Figure 2A of the main text representing all the Stage 2 MD trajectories mapped with the tICA transformation in the space of the first two tIC vectors. The lighter shades (from red to light green to yellow) indicate the most populated regions of the 2D space (see the color bar). Microstates (see Methods) representing the most populated states in these simulations are indicated by the numbered circles (1-7) and represent various stages in the lipid translocation process. **(B)** Structural characteristics of selected microstates. The columns from left to right record the probability distributions of  $d_{\text{chol-121}}$  distance, of  $d_{Z(\text{chol-121})}$  distance, of number of lipids within  $3\text{\AA}$  of cholesterol, and of  $d_{61-89}$  distance. **(C)** Structural snapshot zoomed at the side-entrance to the sterol binding pocket highlighting juxtaposition of D61, K89, and S181 residues (labeled). For completeness, the cholesterol is also shown in space-fill representation and is labeled. **(D)** Structural models representing microstates from panel B. These snapshots illustrate gradual immersion of the cholesterol molecule into the membrane as it exits the binding site. In these models, lipids within  $3\text{\AA}$  of cholesterol are shown in licorice, cholesterol in space-fill, and residue Q121 is colored in ice-blue and labeled. In addition, the C-terminal helix and the  $\Omega_1$  loop are depicted in yellow and purple, respectively, and z-axis direction is highlighted.

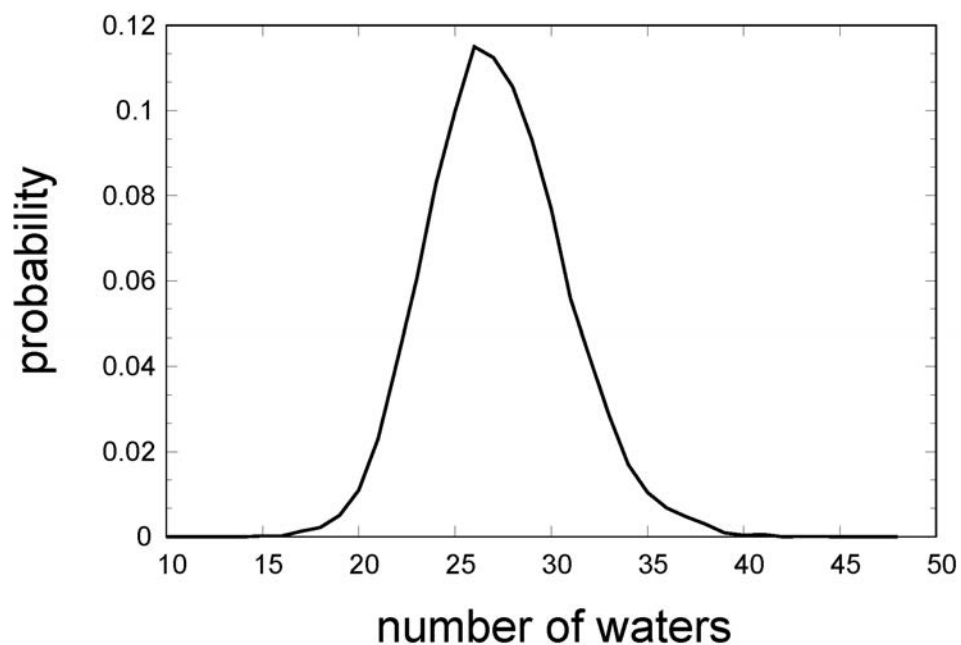

1  
2  
3  
4  
5  
6  
7  
8  
9

**Figure Supplement 4:** Probability distribution of the number of water oxygens in the sterol binding pocket calculated from the analysis of the Stage 1 ensemble MD simulations of *apo* Lam4S2 (based on PDBID 6BYD). The high degree of hydration of the binding pocket seen for the *apo* protein recapitulates the level of solvation observed in the MD simulations of the cholesterol-bound Lam4S2 after sterol exit (see Microstates 5-7 in *Figure 2B*).

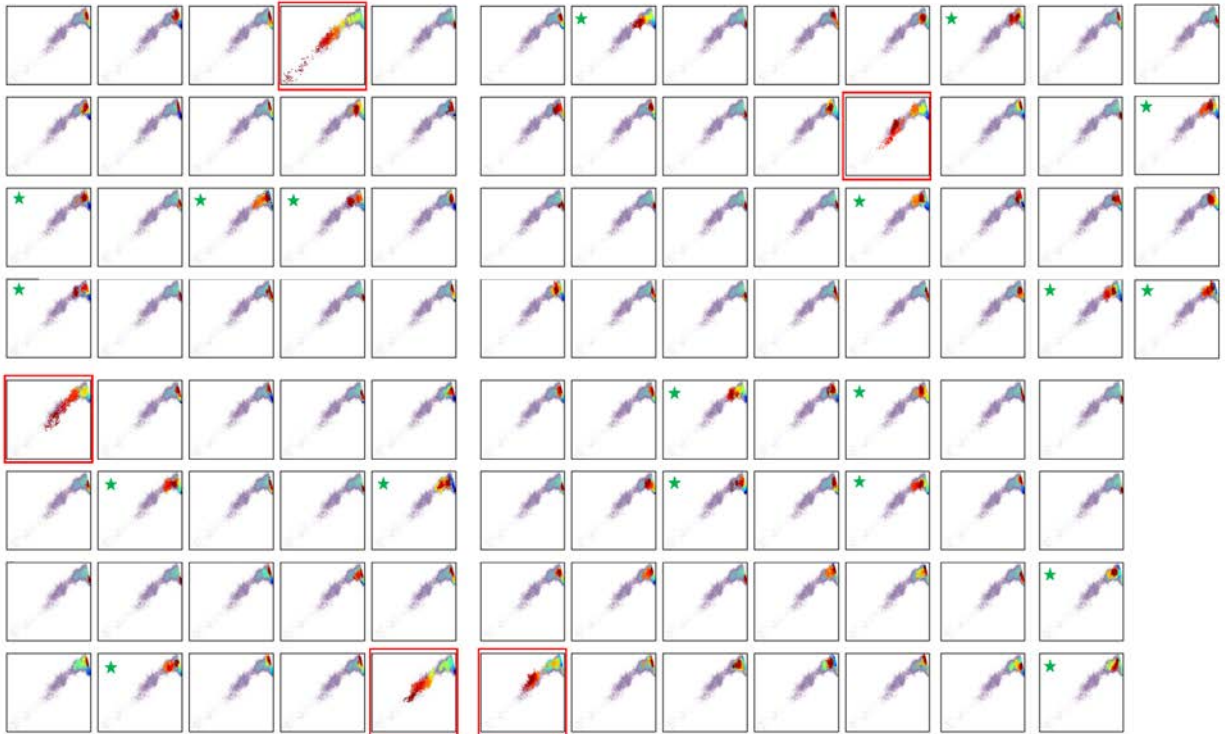

1  
2  
3  
4  
5  
6  
7  
8  
9  
10  
11

**Figure Supplement 5:** Sterol release sampled in multiple trajectories. Projection on the 2D tICA landscape from Figure 2A of each individual trajectory from Stage 2 simulations. The 2D tICA map is drawn as in Figure 2A but using smaller-size transparent dots. The colors of the larger dots indicate the time-frames in the evolution of the trajectories: darker colors (blue, cyan) represent the initial stages of the simulations, lighter colors dots (yellow, green) correspond to the middle part of the trajectories, and red shades show the last third of the trajectories. The tICA landscapes boxed in red represent simulations in which the cholesterol translocation process was sampled in its entirety. The landscapes marked with a green star are simulations in which the system evolved from Microstate 1 to Microstate 5 but did not progress further.



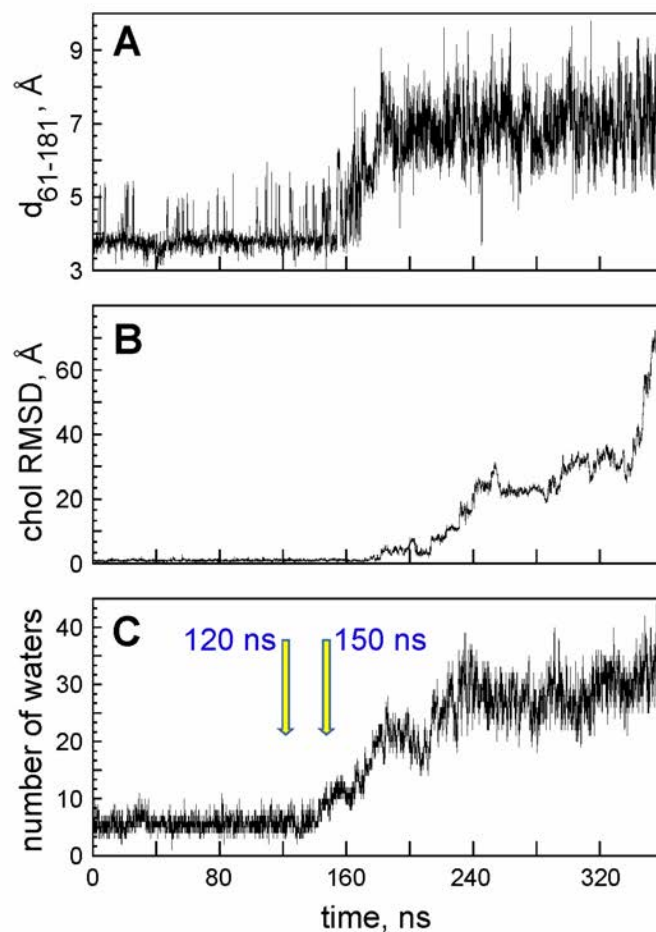

1  
2

3 **Figure Supplement 6:** Selection of trajectory frames to initiate simulations of D61A, S181A, and  
4 K89A mutants. Time-evolution of  $d_{61-181}$  distance (**A**), cholesterol RMSD (**B**), and number of  
5 water oxygens in the sterol binding site (**C**) during one of the Stage 2 simulations in which sterol  
6 release was observed. The two trajectory frames that were selected for initiating simulations of  
7 the mutants are marked by arrows (120 ns and 150 ns time-points).

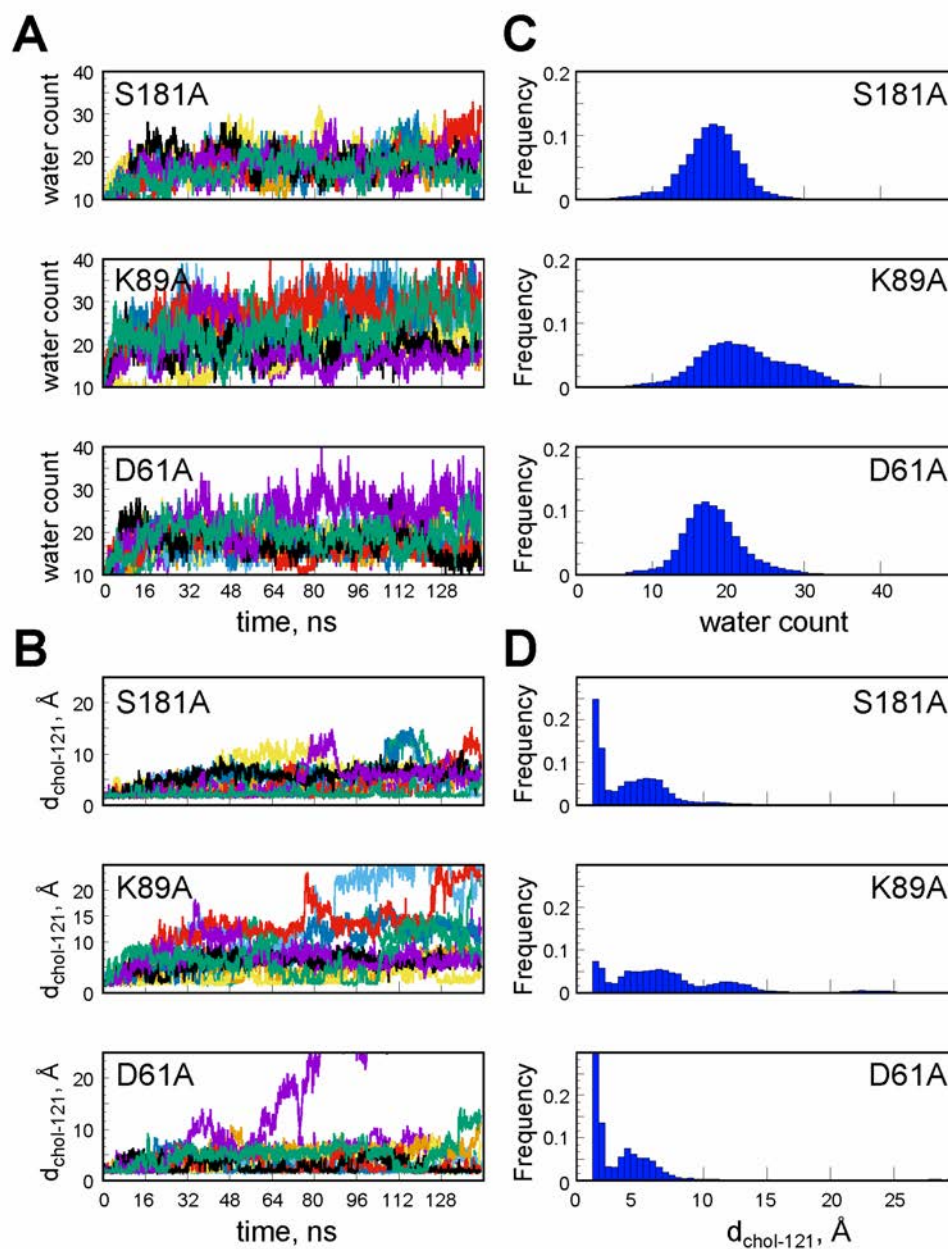

1  
2  
3 **Figure Supplement 7:** Cholesterol destabilization during unbiased ensemble MD simulations of  
4 the S181A, K89A and D61A Lam4S2 mutants. (A) Number of water oxygens in the sterol binding  
5 site as a function of time in simulations of S181A, K89A, and D61A Lam4S2 (top, middle, and  
6 bottom panels, respectively). The results for 10 statistically independent replicates in the  
7 corresponding ensemble of trajectories are shown in different color traces. (B) Minimum  
8 distance between cholesterol and Q121 residue ( $d_{\text{chol-121}}$ ) as a function of time in simulations of  
9 S181A, K89A, and D61A Lam4S2 (top, middle, and bottom panels, respectively). The results for  
10 10 statistically independent replicates in the corresponding ensemble of trajectories are shown  
11 in different color traces. (C) Histograms of number of water oxygens corresponding to the time-  
12 traces in panel A. (D) Histograms of  $d_{\text{chol-121}}$  corresponding to the time-traces in panel B.  
13

1

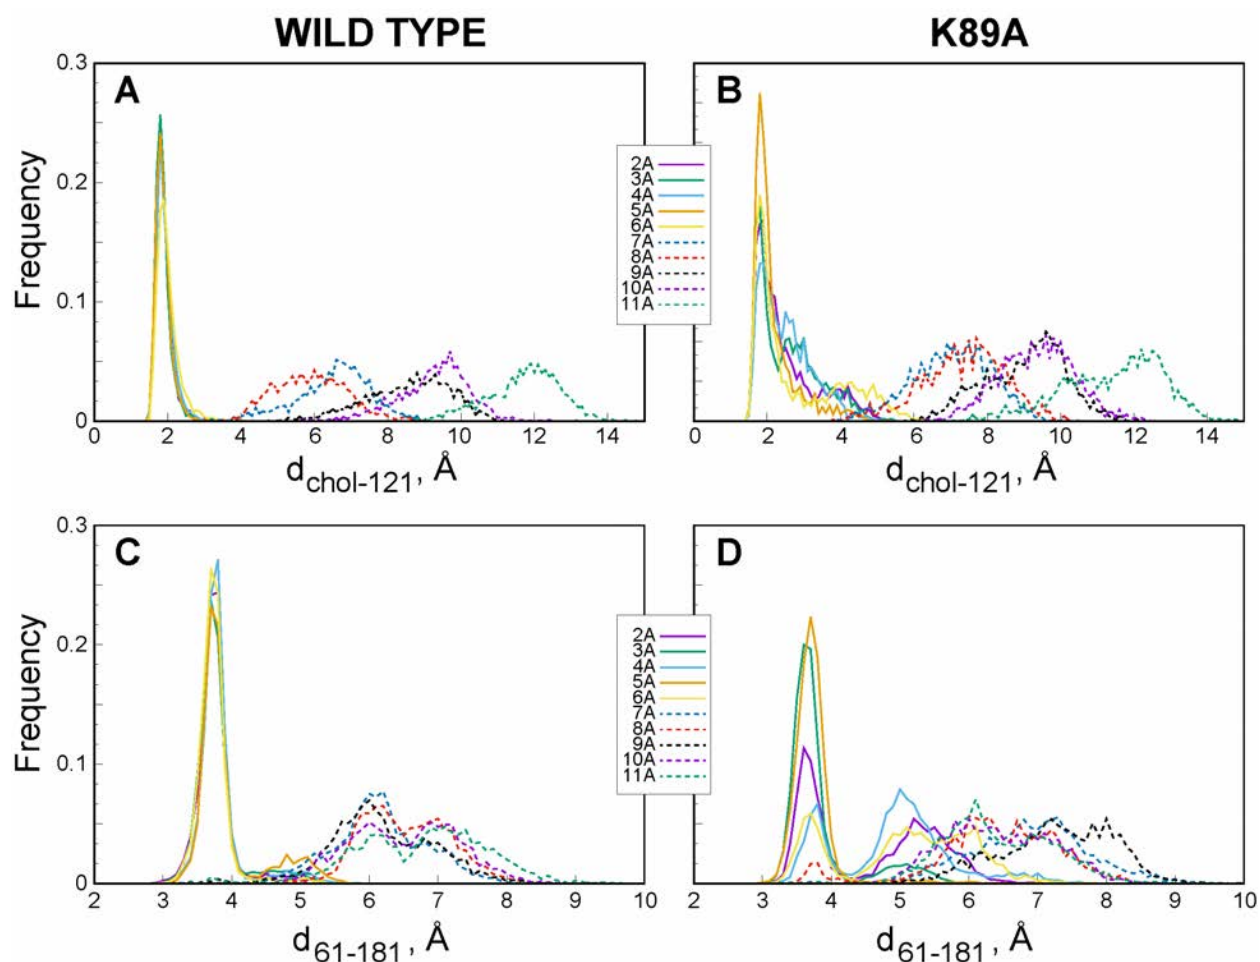

2

3

4 **Figure Supplement 8:** K89A mutation promotes opening of the side-entrance to the binding  
5 pocket and influx of water. Histograms of  $d_{\text{chol-121}}$  (A-B) and  $d_{61-181}$  (C-D) distances constructed  
6 from analysis of trajectories representing various windows in the range of  $d_{Z(\text{chol-121})} \in [2\text{\AA}; 20\text{\AA}]$   
7 from the umbrella MD simulations of the wild type (A, C) and K89A (B, D) systems.

8

9

10

11

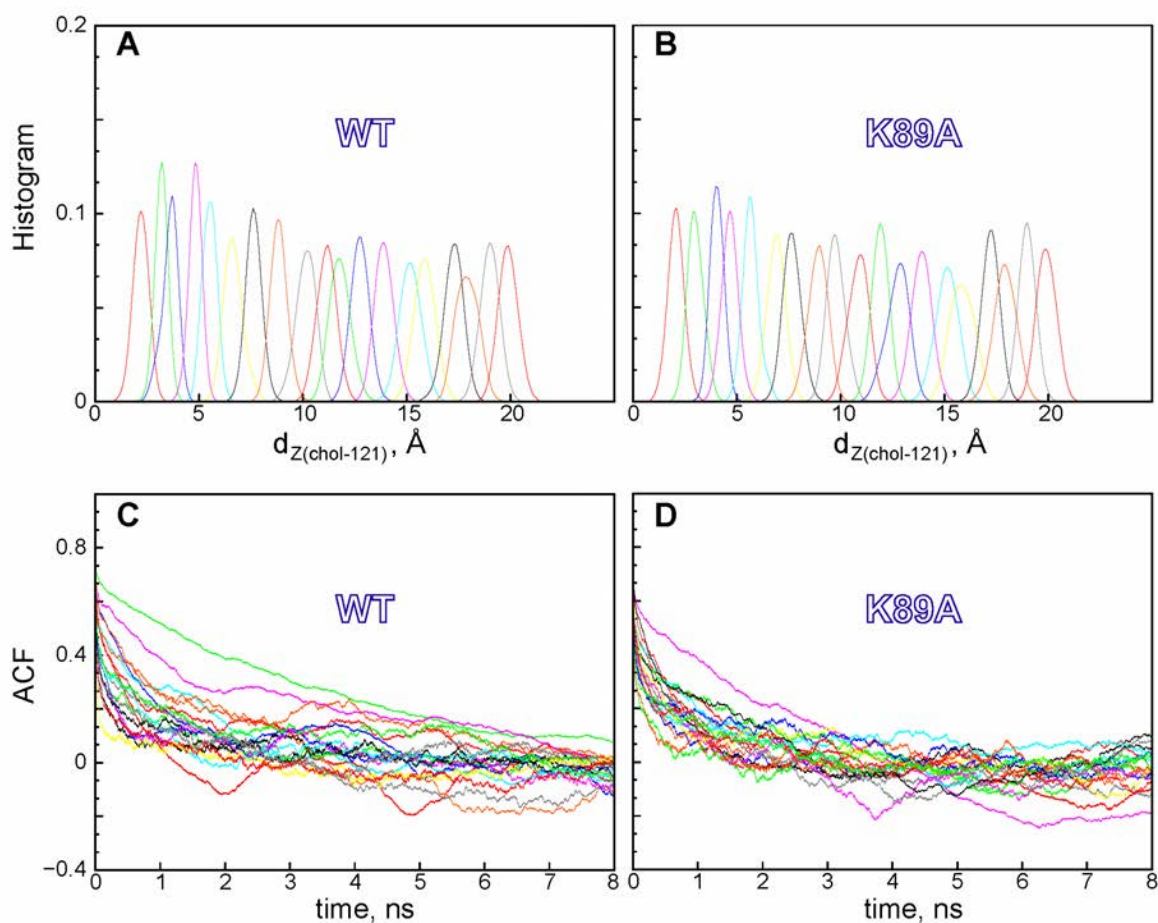

1  
2  
3  
4  
5  
6  
7  
8  
9  
10  
11  
12  
13  
14  
15  
16  
17  
18  
19  
20

**Figure Supplement 9:** The potential of mean force calculations with WHAM. (A-B) Probability distributions of  $d_{Z(\text{chol-121})}$  distance in different windows sampled during the umbrella MD simulations for the wild type (panel A) and the K89A mutant (panel B) systems. The data for the different umbrella windows is represented in histograms of different color. (C-D) Auto-correlation function (ACF) vs. time in different windows sampled during the umbrella MD simulations for the wild type (panel C) and the K89A mutant (panel D) systems. The color-code is the same as in panels A-B.

## 1 **Movie Supplements**

2

3 **Movie Supplement 1:** Molecular dynamics trajectory of cholesterol egress from Lam4S2. The  
4 movie is based on one of the Stage 2 simulations of wild type Lam4S2. The total length of the  
5 trajectory is 350 ns. In the movie, Lam4S2 is shown in white cartoon, the cholesterol molecule is  
6 represented in ice-blue colored space-fill, S181, D61, and K89 residues are drawn in space-fill,  
7 oxygen atoms of water molecules in the sterol binding site are depicted as pink spheres, the  
8 membrane leaflet to which Lam4S2 is bound is represented by the nearby lipid phosphate  
9 atoms (golden spheres), and lipid molecules within 3Å of the cholesterol are shown in licorice  
10 representation. The rest of the simulation box is omitted. For clarity, the trajectory frames are  
11 smoothed for the movie.  
12
